# Supplementary material for: Neutral amino acid transporter SLC38A2 protects renal medulla from hyperosmolarity-induced ferroptosis
Source: eLife journal article supplement (doi:10.7554/elife.80647), 2023-02-01
Supplement: fig5-data1 [file elife-80647-fig5-data1-v2.zip]

A black and white photograph of a gel electrophoresis result. The gel has multiple lanes. The lane on the far right is labeled '100' and contains a single, prominent horizontal band. A red rectangular box is drawn around this band. Other lanes to the left of the '100' lane show faint, less distinct bands.

Western blot analysis showing SNAT2 and  $\beta$ -actin protein levels in C2C12 cells under different osmotic conditions (mOsm). The top panel shows SNAT2 protein levels, with a prominent band at 100 kDa and a smaller band at 55 kDa. The bottom panel shows  $\beta$ -actin protein levels, used as a loading control, with a band at 43 kDa. A red arrow indicates the 500 mOsm condition.

| mOsm           | 300  | 400    | 500  | 600       | 700    | 800  |
|----------------|------|--------|------|-----------|--------|------|
| SNAT2          | Low  | Medium | High | Very High | Medium | Low  |
| $\beta$ -actin | High | High   | High | High      | High   | High |
