# Supplementary material for: Neutral amino acid transporter SLC38A2 protects renal medulla from hyperosmolarity-induced ferroptosis
Source: eLife journal article supplement (doi:10.7554/elife.80647), 2023-02-01
Supplement: supp [file elife_poa_e80647_Figure_2_figure_supplement_3.pdf › elife_poa_e80647_Figure_2_figure_supplement_3.pdf]

|        |        |        |       |         |         |         |         |                 |      |
|--------|--------|--------|-------|---------|---------|---------|---------|-----------------|------|
| 3.33   | 3.08   | 3.49   | 2.98  | 3.23    | 3.12    | 2.96    | 2.33    | <i>Slc1a1</i>   | FPKM |
| 0.00   | 0.00   | 0.00   | 0.00  | 0.00    | 0.00    | 0.00    | 0.00    | <i>Slc1a2</i>   |      |
| 0.12   | 0.10   | 0.11   | 0.13  | 0.32    | 0.26    | 0.24    | 0.15    | <i>Slc1a3</i>   |      |
| 5.06   | 5.50   | 5.51   | 4.89  | 4.49    | 4.69    | 4.45    | 4.62    | <i>Slc1a4</i>   |      |
| 15.99  | 17.52  | 17.19  | 16.16 | 15.30   | 14.16   | 14.33   | 16.71   | <i>Slc1a5</i>   | 400  |
| 0.02   | 0.00   | 0.00   | 0.02  | 0.15    | 0.07    | 0.25    | 0.08    | <i>Slc3a1</i>   | 300  |
| 82.13  | 85.22  | 86.24  | 79.42 | 68.63   | 73.80   | 60.45   | 72.43   | <i>Slc3a2</i>   | 200  |
| 0.00   | 0.00   | 0.00   | 0.00  | 0.00    | 0.00    | 0.00    | 0.00    | <i>Slc6a7</i>   | 100  |
| 1.90   | 1.71   | 2.29   | 1.57  | 3.14    | 2.68    | 2.23    | 2.61    | <i>Slc6a9</i>   | 0    |
| 0.02   | 0.03   | 0.03   | 0.01  | 0.07    | 0.03    | 0.02    | 0.02    | <i>Slc6a14</i>  |      |
| 0.07   | 0.08   | 0.05   | 0.10  | 0.02    | 0.13    | 0.07    | 0.19    | <i>Slc6a15</i>  |      |
| 0.52   | 0.42   | 0.53   | 0.51  | 0.38    | 0.42    | 0.42    | 0.34    | <i>Slc6a17</i>  |      |
| 0.02   | 0.05   | 0.06   | 0.03  | 0.01    | 0.04    | 0.03    | 0.00    | <i>Slc6a18</i>  |      |
| 0.42   | 0.29   | 0.42   | 0.35  | 0.17    | 0.15    | 0.06    | 0.11    | <i>Slc6a19</i>  |      |
| 0.01   | 0.00   | 0.00   | 0.00  | 0.01    | 0.01    | 0.00    | 0.00    | <i>Slc6a20b</i> |      |
| 15.28  | 15.90  | 16.83  | 16.02 | 19.86   | 17.83   | 19.81   | 18.07   | <i>Slc7a1</i>   |      |
| 0.01   | 0.00   | 0.00   | 0.00  | 0.01    | 0.00    | 0.00    | 0.00    | <i>Slc7a2</i>   |      |
| 0.06   | 0.07   | 0.05   | 0.08  | 0.03    | 0.05    | 0.00    | 0.07    | <i>Slc7a3</i>   |      |
| 0.20   | 0.12   | 0.16   | 0.18  | 0.26    | 0.12    | 0.12    | 0.06    | <i>Slc7a4</i>   |      |
| 107.71 | 112.77 | 115.40 | 97.58 | 146.65  | 142.29  | 131.17  | 155.55  | <i>Slc7a5</i>   |      |
| 28.06  | 31.01  | 30.93  | 31.13 | 35.23   | 29.90   | 32.99   | 29.34   | <i>Slc7a6</i>   |      |
| 0.41   | 0.43   | 0.42   | 0.54  | 0.57    | 0.35    | 0.38    | 0.53    | <i>Slc7a7</i>   |      |
| 0.00   | 0.00   | 0.01   | 0.00  | 0.04    | 0.05    | 0.02    | 0.01    | <i>Slc7a8</i>   |      |
| 0.00   | 0.00   | 0.00   | 0.00  | 0.04    | 0.09    | 0.04    | 0.02    | <i>Slc7a9</i>   |      |
| 0.00   | 0.00   | 0.00   | 0.00  | 0.00    | 0.00    | 0.00    | 0.00    | <i>Slc7a10</i>  |      |
| 0.19   | 0.17   | 0.23   | 0.33  | 0.66    | 0.66    | 0.95    | 0.63    | <i>Slc7a11</i>  |      |
| 0.00   | 0.00   | 0.00   | 0.00  | 0.03    | 0.00    | 0.11    | 0.00    | <i>Slc7a13</i>  |      |
| 0.00   | 0.00   | 0.00   | 0.00  | 0.01    | 0.01    | 0.01    | 0.03    | <i>Slc7a14</i>  |      |
| 0.08   | 0.09   | 0.08   | 0.05  | 0.30    | 0.18    | 0.39    | 0.27    | <i>Slc15a3</i>  |      |
| 6.52   | 6.56   | 6.74   | 5.93  | 4.46    | 4.00    | 4.26    | 4.41    | <i>Slc15a4</i>  |      |
| 0.16   | 0.17   | 0.16   | 0.27  | 0.44    | 0.48    | 0.41    | 0.36    | <i>Slc16a10</i> |      |
| 0.28   | 0.15   | 0.00   | 0.26  | 0.04    | 0.04    | 0.08    | 0.05    | <i>Slc25a2</i>  |      |
| 7.08   | 7.00   | 7.14   | 7.05  | 10.22   | 10.79   | 9.89    | 10.21   | <i>Slc25a12</i> |      |
| 21.92  | 23.90  | 24.61  | 24.57 | 10.15   | 8.88    | 10.05   | 8.42    | <i>Slc25a13</i> |      |
| 7.95   | 8.46   | 8.52   | 8.18  | 6.12    | 7.23    | 6.99    | 6.46    | <i>Slc25a15</i> |      |
| 3.34   | 3.76   | 3.27   | 2.96  | 2.77    | 3.09    | 2.66    | 3.11    | <i>Slc25a26</i> |      |
| 2.14   | 2.23   | 1.75   | 1.73  | 0.43    | 0.37    | 0.31    | 0.79    | <i>Slc25a29</i> |      |
| 6.53   | 5.70   | 6.47   | 5.86  | 6.72    | 6.25    | 6.00    | 6.92    | <i>Slc25a38</i> |      |
| 2.18   | 2.43   | 2.40   | 1.57  | 1.11    | 0.90    | 0.97    | 1.05    | <i>Slc36a1</i>  |      |
| 0.00   | 0.00   | 0.00   | 0.00  | 0.00    | 0.00    | 0.00    | 0.00    | <i>Slc36a3</i>  |      |
| 1.21   | 1.32   | 1.28   | 1.39  | 1.63    | 1.75    | 1.79    | 1.31    | <i>Slc36a4</i>  |      |
| 9.27   | 9.41   | 9.52   | 9.24  | 5.62    | 6.48    | 6.27    | 5.16    | <i>Slc38a1</i>  |      |
| 31.85  | 31.27  | 33.37  | 34.57 | 437.45  | 492.51  | 478.34  | 363.29  | <i>Slc38a2</i>  |      |
| 0.00   | 0.00   | 0.00   | 0.00  | 0.03    | 0.02    | 0.10    | 0.02    | <i>Slc38a3</i>  |      |
| 0.00   | 0.00   | 0.00   | 0.00  | 0.00    | 0.04    | 0.00    | 0.06    | <i>Slc38a4</i>  |      |
| 1.37   | 1.21   | 1.32   | 1.51  | 0.84    | 0.97    | 1.01    | 0.62    | <i>Slc38a6</i>  |      |
| 9.37   | 10.29  | 10.89  | 9.26  | 7.45    | 8.53    | 6.93    | 8.91    | <i>Slc38a7</i>  |      |
| 0.52   | 0.62   | 0.57   | 0.68  | 0.37    | 0.36    | 0.38    | 0.32    | <i>Slc38a9</i>  |      |
| 17.09  | 15.94  | 17.08  | 15.02 | 18.91   | 18.60   | 17.10   | 21.19   | <i>Slc38a10</i> |      |
| 0.00   | 0.01   | 0.01   | 0.00  | 0.00    | 0.01    | 0.01    | 0.00    | <i>Slc43a1</i>  |      |
| 0.35   | 0.51   | 0.38   | 0.50  | 0.28    | 0.29    | 0.21    | 0.32    | <i>Slc43a2</i>  |      |
| ISO_1  | ISO_2  | ISO_3  | ISO_4 | HYPER_1 | HYPER_2 | HYPER_3 | HYPER_4 |                 |      |
