# Supplementary material for: Neutral amino acid transporter SLC38A2 protects renal medulla from hyperosmolarity-induced ferroptosis
Source: eLife journal article supplement (doi:10.7554/elife.80647), 2023-02-01
Supplement: supp [file elife_poa_e80647_Figure_3_figure_supplement_1.pdf › elife_poa_e80647_Figure_3_figure_supplement_1.pdf]

A

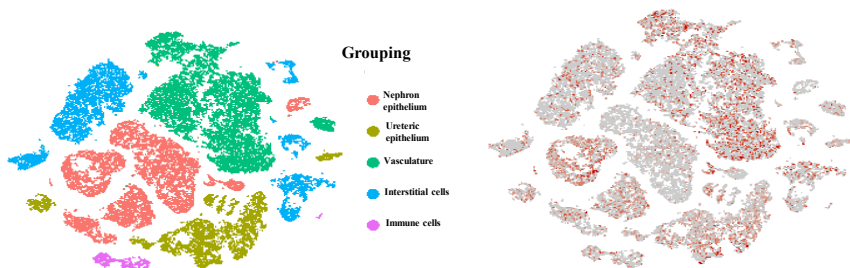

B

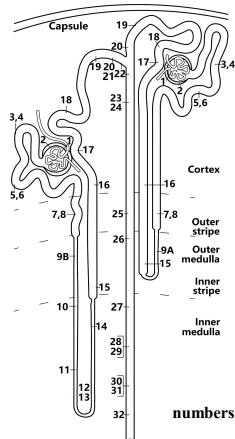

### Cortical nephron and ureteric epithelium cell transcriptomes

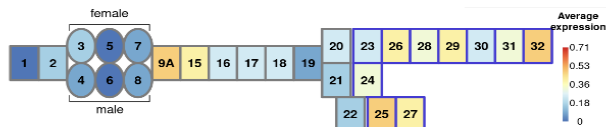

### Juxtamedullary nephron and ureteric epithelium cell transcriptomes

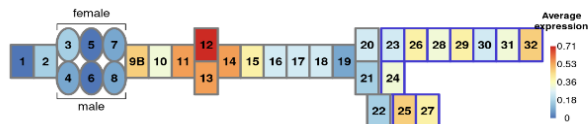

numbers in boxes correspond to schematic. Rescaled value is original value rescaled (gene-wise) to 0-1 range.
