# Supplementary material for: Neutral amino acid transporter SLC38A2 protects renal medulla from hyperosmolarity-induced ferroptosis
Source: eLife journal article supplement (doi:10.7554/elife.80647), 2023-02-01
Supplement: supp [file Figure 1-figure supplement 1A.xlsx]

## Sheet: Sheet1
300 mOsm	600 mOsm
94.7721	67.5855
108.596	87.2524
102.193	65.2651
112.507	59.9869
103.114	63.8585
99.8006	68.4926
91.4592	65.4426
104.546	66.8361
93.8913	75.3681
95.1074	73.8826
91.8931	68.4991
102.121	69.0447
two-tailed Student’s t test, n=12. twelve biological replicates.
