# Supplementary material for: Neutral amino acid transporter SLC38A2 protects renal medulla from hyperosmolarity-induced ferroptosis
Source: eLife journal article supplement (doi:10.7554/elife.80647), 2023-02-01
Supplement: supp [file Figure 1-figure supplement 2A.xlsx]

## Sheet: Sheet1
ISO	HYPER
49.013	165.49
43.8439	166.117
58.2469	239.215
84.3824	159.095
two-tailed Student’s t test, n=4. four biological replicates.
