# Supplementary material for: Neutral amino acid transporter SLC38A2 protects renal medulla from hyperosmolarity-induced ferroptosis
Source: eLife journal article supplement (doi:10.7554/elife.80647), 2023-02-01
Supplement: supp [file Figure 1-figure supplement 2B.xlsx]

## Sheet: Sheet1
ISO	HYPER
5244.39	4382.26
5441.21	4712.53
5506.64	3859.55
5071.11	4625.04
two-tailed Student’s t test, n=4. four biological replicates.
