# Supplementary material for: Neutral amino acid transporter SLC38A2 protects renal medulla from hyperosmolarity-induced ferroptosis
Source: eLife journal article supplement (doi:10.7554/elife.80647), 2023-02-01
Supplement: supp [file Figure 1-figure supplement 2C.xlsx]

## Sheet: Sheet1
ISO	HYPER
48.0327	67.7004
58.4586	70.5997
38.8312	79.7384
37.2008	67.7001
two-tailed Student’s t test, n=4. four biological replicates.
