# Supplementary material for: Neutral amino acid transporter SLC38A2 protects renal medulla from hyperosmolarity-induced ferroptosis
Source: eLife journal article supplement (doi:10.7554/elife.80647), 2023-02-01
Supplement: supp [file Figure 1-figure supplement 2D.xlsx]

## Sheet: Sheet1
ISO	HYPER
5413	7422.32
6171.03	6193.05
5602.79	6193.71
5467.61	8275.2
two-tailed Student’s t test, n=4. four biological replicates.
