# Supplementary material for: Neutral amino acid transporter SLC38A2 protects renal medulla from hyperosmolarity-induced ferroptosis
Source: eLife journal article supplement (doi:10.7554/elife.80647), 2023-02-01
Supplement: supp [file Figure 1A.xlsx]

## Sheet: Sheet1
nM	300mOsm				600mOsm
0	97.8451	92.4235	102.024	107.708	56.6708	64.8719	63.554	60.862
60	107.47	101.743	106.021	108.463	68.5259	74.5097	70.6059	70.075
125	93.0231	95.7339	106.29	108.763	74.6658	82.0924	80.8682	77.7452
250	99.6752	100.418	106.415	110.269	79.8126	88.3573	89.6627	83.4166
500	102.979	75.7776	107.27	108.695	90.356	99.2505	100.375	97.7077
1000	107.964	110.787	112.386	107.258	105.259	104.122	106.889	109.282
two-tailed Student’s t test, n=4. four biological replicates.
