# Supplementary material for: Neutral amino acid transporter SLC38A2 protects renal medulla from hyperosmolarity-induced ferroptosis
Source: eLife journal article supplement (doi:10.7554/elife.80647), 2023-02-01
Supplement: supp [file Figure 1B.xlsx]

## Sheet: Sheet1
nM	300mOsm				600mOsm
0	101.859	100.629	99.0155	98.4966	54.5901	56.5759	57.9045	58.437
60	102.42	101.183	101.077	98.4895	59.5941	62.3023	59.5444	56.758
125	99.8543	105.107	106.507	99.4136	66.5814	73.7819	67.4486	63.994
250	106.209	98.6743	108.306	103.003	75.5731	76.49	73.86	80.2786
500	96.2363	101.432	97.0537	103.97	83.79	84.1668	80.3213	83.2569
1000	102.854	102.854	100.522	100.359	104.084	102.392	95.9519	90.7631
two-tailed Student’s t test, n=4. four biological replicates.
