# Supplementary material for: Neutral amino acid transporter SLC38A2 protects renal medulla from hyperosmolarity-induced ferroptosis
Source: eLife journal article supplement (doi:10.7554/elife.80647), 2023-02-01
Supplement: supp [file Figure 1C.xlsx]

## Sheet: Sheet1
300-DMSO	600-DMSO	600-Lip-1	600-Fer-1
0.827068	10.3759	0.270677	0.796992
0.872181	18.1955	0.165413	0.225564
1.42857	8.87218	0.31579	0.240601
0.872181	16.2406	0.390977	0.466165
1.00761	4.04389	1.31258	1.02642
1.03583	4.01702	0.939095	1.5047
0.956561	4.11106	1.66592	1.09494
one-way ANOVA tests, n=7. seven biological replicates.
