# Supplementary material for: Neutral amino acid transporter SLC38A2 protects renal medulla from hyperosmolarity-induced ferroptosis
Source: eLife journal article supplement (doi:10.7554/elife.80647), 2023-02-01
Supplement: supp [file Figure 1D.xlsx]

## Sheet: Sheet1
μM	300mOsm				500mOsm
0	100.57	97.5488	97.0574	104.823	87.9202	87.8231	94.7883	84.9654
1	99.5935	97.9129	82.8419	85.6146	65.7748	88.6907	82.4536	90.7293
2	95.9714	98.8533	92.1005	86.0151	79.6202	84.6803	83.0785	78.1337
5	85.8998	89.1154	91.3178	90.6807	79.4867	77.709	82.0592	63.809
10	88.0658	93.4717	87.3074	82.3068	68.7477	63.2994	65.162	52.7424
20	75.0564	84.7713	76.1728	79.7294	43.5566	49.7088	41.2693	27.1508
two-way ANOVA tests, n=4. four biological replicates.
