# Supplementary material for: Neutral amino acid transporter SLC38A2 protects renal medulla from hyperosmolarity-induced ferroptosis
Source: eLife journal article supplement (doi:10.7554/elife.80647), 2023-02-01
Supplement: supp [file Figure 1E.xlsx]

## Sheet: Sheet1
nM	300mOsm				500mOsm
0	109.566	101.441	94.0962	94.897	85.1176	86.7649	95.0598	91.8499
60	73.8667	91.7067	87.9954	87.7741	79.2317	76.5687	66.3465	46.677
125	65.2332	60.083	55.6165	54.3338	45.5831	49.9455	47.5039	62.6483
250	60.4411	55.343	49.4897	51.9248	64.4388	67.2386	64.7839	53.0903
500	61.587	55.2649	58.8264	52.361	57.3224	59.178	54.3143	49.8478
1000	59.7835	64.0612	62.2251	55.6165	45.7459	46.677	42.1454	47.4127
two-way ANOVA tests, n=4. four biological replicates.
