# Supplementary material for: Neutral amino acid transporter SLC38A2 protects renal medulla from hyperosmolarity-induced ferroptosis
Source: eLife journal article supplement (doi:10.7554/elife.80647), 2023-02-01
Supplement: supp [file Figure 1F.xlsx]

## Sheet: Sheet1
300mOsm	500mOsm	300mOsm+erastin	300mOsm+RSL3	500mOsm+erastin	500mOsm+RSL3
0.951763	3.46939	3.71057	18.4787	7.05009	18.2375
1.03711	2.57885	3.56215	18.5343	7.23562	18.1076
1.01113	2.78293	3.24675	18.5529	7.34694	17.9777
one-way ANOVA tests, n=3. three biological replicates.
