# Supplementary material for: Neutral amino acid transporter SLC38A2 protects renal medulla from hyperosmolarity-induced ferroptosis
Source: eLife journal article supplement (doi:10.7554/elife.80647), 2023-02-01
Supplement: supp [file Figure 2-figure supplement 1A.xlsx]

## Sheet: Sheet1
	300 mOsm				600 mOsm
Slco4a1	0.775934	1.1736	1.11367	0.936797	67.4206	52.1201	59.8507	59.6853
Slc5a3	1.02484	0.818877	0.886662	1.26962	17.0351	14.9062	32.3557	15.0142
Slc38a2	0.972104	0.954278	1.0185	1.05512	13.3508	15.0313	14.5988	11.0874
Slc34a2	0.473383	1.32331	0.669722	1.53359	6.22735	11.7824	4.75086	5.44891
Slc45a3	1.04485	0.945263	1.04022	0.969676	5.73008	3.80881	4.89114	4.84888
Slc30a4	0.985223	0.912999	0.945387	1.15639	3.94272	3.36913	5.77633	3.12096
Slc15a3	1.05143	1.22467	1.11564	0.608259	4.03421	2.36643	5.13723	3.63077
Slc7a11	0.832542	0.744739	0.989389	1.43333	2.81103	2.82168	4.06334	2.70241
Slc6a6	1.03894	1.00253	1.00887	0.949656	3.27842	2.70024	3.27948	2.97243
Slc16a10	0.853649	0.903906	0.841734	1.40071	2.29699	2.50691	2.17254	1.87587
two-tailed Student’s t test, n=4. four biological replicates.
