# Supplementary material for: Neutral amino acid transporter SLC38A2 protects renal medulla from hyperosmolarity-induced ferroptosis
Source: eLife journal article supplement (doi:10.7554/elife.80647), 2023-02-01
Supplement: supp [file Figure 2-figure supplement 1B.xlsx]

## Sheet: Sheet1
Slc38a1	Slc38a2	Slc38a3	Slc38a4	Slc38a5	Slc38a6
9.27265	31.8518	0	0	0	1.37132
9.40772	31.2677	0	0	0	1.20646
9.51651	33.3719	0	0	0	1.31965
9.23747	34.5719	0	0	0	1.5077
Slc38a7	Slc38a8	Slc38a9	Slc38a10	Slc38a11
9.37385	0	0.518941	17.0944	0
10.294	0	0.622575	15.9366	0
10.888	0.043811	0.568986	17.078	0
9.25737	0	0.684479	15.0183	0
n=4. four biological replicates.
