# Supplementary material for: Neutral amino acid transporter SLC38A2 protects renal medulla from hyperosmolarity-induced ferroptosis
Source: eLife journal article supplement (doi:10.7554/elife.80647), 2023-02-01
Supplement: supp [file Figure 2-figure supplement 4A.xlsx]

## Sheet: Sheet1
Control (Pex3)	p-Slc38a2-C-EGFP
1.00833	725.068
0.642591	468.522
1.34908	640.019
two-tailed Student’s t test, n=3. three biological replicates.
