# Supplementary material for: Neutral amino acid transporter SLC38A2 protects renal medulla from hyperosmolarity-induced ferroptosis
Source: eLife journal article supplement (doi:10.7554/elife.80647), 2023-02-01
Supplement: supp [file Figure 2C.xlsx]

## Sheet: Sheet1
	300 mOsm				600 mOsm
Hspa1a	0.94268	1.34071	0.935904	0.780705	76.8532	56.4374	54.5366	79.0393
Hspa1b	0.992943	0.985495	1.0504	0.971161	16.2495	14.0741	13.6757	17.9154
Nfat5	1.05371	0.88196	0.942484	1.12185	4.19243	3.63751	5.98475	3.39758
Gadd45b	1.06441	0.988304	1.01106	0.936229	4.46433	5.32108	3.73889	5.63489
Hif1a	0.998041	0.903005	0.980996	1.11796	2.54332	2.0771	3.07763	1.5418
Hspa41	1.01335	0.840543	0.921999	1.22411	3.145	2.40987	4.85205	2.6782
two-tailed Student’s t test, n＝4, four biological replicates.
