# Supplementary material for: Neutral amino acid transporter SLC38A2 protects renal medulla from hyperosmolarity-induced ferroptosis
Source: eLife journal article supplement (doi:10.7554/elife.80647), 2023-02-01
Supplement: supp [file Figure 2D.xlsx]

## Sheet: Sheet1
	300 mOsm				600 mOsm
Slc38a1	0.990818	1.00525	1.01687	0.987058	0.600162	0.692612	0.669544	0.550913
Slc38a2	0.972104	0.954278	1.0185	1.05512	13.3508	15.0313	14.5988	11.0874
Slc38a7	0.941783	1.03422	1.09391	0.93008	0.748762	0.856968	0.69658	0.895055
Slc38a10	1.04991	0.978797	1.0489	0.922399	1.16119	1.14219	1.05002	1.30156
two-tailed Student’s t test, n＝4, four biological replicates.
