# Supplementary material for: Neutral amino acid transporter SLC38A2 protects renal medulla from hyperosmolarity-induced ferroptosis
Source: eLife journal article supplement (doi:10.7554/elife.80647), 2023-02-01
Supplement: supp [file Figure 3B.xlsx]

## Sheet: Sheet1
Con	WD
0.515376	4.985
2.42066	1.42029
0.61396	5.73706
1.63344	2.50285
0.327875	3.24783
0.488692	2.624
two-tailed Student’s t test, n=6. six biological replicates.
