# Supplementary material for: Neutral amino acid transporter SLC38A2 protects renal medulla from hyperosmolarity-induced ferroptosis
Source: eLife journal article supplement (doi:10.7554/elife.80647), 2023-02-01
Supplement: supp [file Figure 3D.xlsx]

## Sheet: Sheet1
Con	WD
1.08238	2.14611
0.765601	2.18826
1.15202	2.4372
	2.32416
	2.38135
two-tailed Student’s t test, n=3-5. three or five biological replicates
