# Supplementary material for: Neutral amino acid transporter SLC38A2 protects renal medulla from hyperosmolarity-induced ferroptosis
Source: eLife journal article supplement (doi:10.7554/elife.80647), 2023-02-01
Supplement: supp [file Figure 4-figure supplement 1B.xlsx]

## Sheet: Sheet1
	WT			KO
Kidney	0.973084	0.966363	1.06055	0.052579	0.065183	0.058881
Liver	10.2457	9.82832	4.32874	0.047595	0.070167	0.058881
n=3. three biological replicates.
