# Supplementary material for: Neutral amino acid transporter SLC38A2 protects renal medulla from hyperosmolarity-induced ferroptosis
Source: eLife journal article supplement (doi:10.7554/elife.80647), 2023-02-01
Supplement: supp [file Figure 4-figure supplement 2A.xlsx]

## Sheet: Sheet1
WT	KO
1160	1855
1440	1275
1230	1748
1285	1660
1020	980
1380	2150
	1520
	2130
two-tailed Student’s t test, n=6-8. six or eight biological replicates.
