# Supplementary material for: Neutral amino acid transporter SLC38A2 protects renal medulla from hyperosmolarity-induced ferroptosis
Source: eLife journal article supplement (doi:10.7554/elife.80647), 2023-02-01
Supplement: supp [file Figure 4-figure supplement 2B.xlsx]

## Sheet: Sheet1
WT	KO
51.1545	85.5892
40.6051	60.5096
54.9363	90.5762
45.3479	82.6869
59.751	73.0634
44.2128	56.7787
	77.0399
	84.793
two-tailed Student’s t test, n=6-8. six or eight biological replicates.
