# Supplementary material for: Neutral amino acid transporter SLC38A2 protects renal medulla from hyperosmolarity-induced ferroptosis
Source: eLife journal article supplement (doi:10.7554/elife.80647), 2023-02-01
Supplement: supp [file Figure 4-figure supplement 2C.xlsx]

## Sheet: Sheet1
WT	KO
2540	4030
1990	4550
2590	4230
2000	3210
2600	3150
2330	3170
	2740
	3500
two-tailed Student’s t test, n=6-8. six or eight biological replicates.
