# Supplementary material for: Neutral amino acid transporter SLC38A2 protects renal medulla from hyperosmolarity-induced ferroptosis
Source: eLife journal article supplement (doi:10.7554/elife.80647), 2023-02-01
Supplement: supp [file Figure 4-figure supplement 2D.xlsx]

## Sheet: Sheet1
WT-WD	KO-WD
410	1070
860	700
570	1103
570	405
630	700
900	400
	865
	680
two-tailed Student’s t test, n=6-8. six or eight biological replicates.
