# Supplementary material for: Neutral amino acid transporter SLC38A2 protects renal medulla from hyperosmolarity-induced ferroptosis
Source: eLife journal article supplement (doi:10.7554/elife.80647), 2023-02-01
Supplement: supp [file Figure 4-figure supplement 2E.xlsx]

## Sheet: Sheet1
WT-WD	KO-WD
24.0405	35.8974
24.2553	26.6667
30.9734	46.9089
39.7878	38.9908
42.5964	30.9842
18.552	49.8835
	53.1108
	60.6711
two-tailed Student’s t test, n=6-8. six or eight biological replicates.
