# Supplementary material for: Neutral amino acid transporter SLC38A2 protects renal medulla from hyperosmolarity-induced ferroptosis
Source: eLife journal article supplement (doi:10.7554/elife.80647), 2023-02-01
Supplement: supp [file Figure 4-figure supplement 2F.xlsx]

## Sheet: Sheet1
WT	KO	WT-WD	KO-WD
2540	4030	4870	5630
1990	4550	5020	4780
2590	4230	4090	4420
2000	3210	4920	5020
2600	3150	5040	4250
2330	3170	4760	4590
	2740		4700
	3500		4020
one-way ANOVA tests, n=6-8. six or eight biological replicates.
