# Supplementary material for: Neutral amino acid transporter SLC38A2 protects renal medulla from hyperosmolarity-induced ferroptosis
Source: eLife journal article supplement (doi:10.7554/elife.80647), 2023-02-01
Supplement: supp [file Figure 4-figure supplement 3A.xlsx]

## Sheet: Sheet1
	GPX4			p-s6
WT-WD	1.39708	0.687742	0.915179	1.15666	0.863175	0.980168
KO-WD	0.258657	0.11264	0.326783	0.662727	0.541208	0.261236
	s6			p-4EBP1
WT-WD	1.61261	0.710617	0.676773	0.90932	0.970716	1.11996
KO-WD	0.115276	0.184766	0.16614	0.824296	0.692632	0.466398
	4EBP1
WT-WD	1.06787	1.02242	0.90971
KO-WD	0.420383	0.253117	0.126544
two-tailed Student’s t test, n=3. three biological replicates.
