# Supplementary material for: Neutral amino acid transporter SLC38A2 protects renal medulla from hyperosmolarity-induced ferroptosis
Source: eLife journal article supplement (doi:10.7554/elife.80647), 2023-02-01
Supplement: supp [file Figure 4-figure supplement 3C.xlsx]

## Sheet: Sheet1
WT-WD	KO-WD
12772.2	30282.3
26987.3	22043.2
38925.8	64856.6
42408.9	19934.1
15797.9	7250.94
12949.6	10722.9
13966.1	9890.68
n=7. seven biological replicates.
