# Supplementary material for: Neutral amino acid transporter SLC38A2 protects renal medulla from hyperosmolarity-induced ferroptosis
Source: eLife journal article supplement (doi:10.7554/elife.80647), 2023-02-01
Supplement: supp [file Figure 4D.xlsx]

## Sheet: Sheet1
WT-WD	KO-WD
2.47511	2.71936
0.942982	2.97473
2.33208	2.14655
0.965457	2.0784
2.43568	2.61369
2.11197	3.05781
1.64355	2.60728
1.2641	2.19021
two-tailed Student’s t test, n=8. eight biological replicates.
