# Supplementary material for: Neutral amino acid transporter SLC38A2 protects renal medulla from hyperosmolarity-induced ferroptosis
Source: eLife journal article supplement (doi:10.7554/elife.80647), 2023-02-01
Supplement: supp [file Figure 4E.xlsx]

## Sheet: Sheet1
WT-WD	KO-WD
125.101	103.222
137.545	100.965
110.978	88.8102
117.924	95.9295
93.267	70.2308
86.2635	75.0927
113.004	40.0753
110.862	78.5076
two-tailed Student’s t test, n=8. eight biological replicates.
