# Supplementary material for: Neutral amino acid transporter SLC38A2 protects renal medulla from hyperosmolarity-induced ferroptosis
Source: eLife journal article supplement (doi:10.7554/elife.80647), 2023-02-01
Supplement: supp [file Figure 4F.xlsx]

## Sheet: Sheet1
WT-WD	KO-WD
97.8375	77.414
119.435	74.922
86.4842	63.6121
99.9545	67.3986
80.8835	51.8858
64.0695	47.2659
93.8612	12.2485
86.4154	51.9951
two-tailed Student’s t test, n=8. eight biological replicates.
