# Supplementary material for: Neutral amino acid transporter SLC38A2 protects renal medulla from hyperosmolarity-induced ferroptosis
Source: eLife journal article supplement (doi:10.7554/elife.80647), 2023-02-01
Supplement: supp [file Figure 4G.xlsx]

## Sheet: Sheet1
WT-WD	KO-WD
7.17717	5.99913
13.1898	5.75369
7.06165	5.04895
11.125	4.7246
13.0631	5.6567
5.77359	3.39715
9.80637	0.880337
7.06958	3.92231
two-tailed Student’s t test, n=8. eight biological replicates.
