# Supplementary material for: Neutral amino acid transporter SLC38A2 protects renal medulla from hyperosmolarity-induced ferroptosis
Source: eLife journal article supplement (doi:10.7554/elife.80647), 2023-02-01
Supplement: supp [file Figure 4H.xlsx]

## Sheet: Sheet1
WT-WD	KO-WD
1.77778	6.22155
2.52289	3.12439
3.13002	4.0106
1.21791	2.93888
1.21427	3.12196
1.08903	1.90494
1.08018	1.52364
0.843658	1.68552
two-tailed Student’s t test, n=8. eight biological replicates.
