# Supplementary material for: Neutral amino acid transporter SLC38A2 protects renal medulla from hyperosmolarity-induced ferroptosis
Source: eLife journal article supplement (doi:10.7554/elife.80647), 2023-02-01
Supplement: supp [file Figure 4I.xlsx]

## Sheet: Sheet1
WT-WD	KO-WD
7.35801	2.78287
7.5469	2.20959
6.58533	1.23285
19.4424	1.87208
9.82876	2.37355
7.82757	2.40099
5.37997	3.06494
two-tailed Student’s t test, n=7. seven biological replicates.
