# Supplementary material for: Neutral amino acid transporter SLC38A2 protects renal medulla from hyperosmolarity-induced ferroptosis
Source: eLife journal article supplement (doi:10.7554/elife.80647), 2023-02-01
Supplement: supp [file Figure 4J.xlsx]

## Sheet: Sheet1
WT-WD	KO-WD
3.65575	9.516
5.22467	20.6348
18.5597	30.8005
2.35867	24.392
1.95733	23.5302
10.6073	12.293
two-tailed Student’s t test, n=6. six biological replicates.
