# Supplementary material for: Neutral amino acid transporter SLC38A2 protects renal medulla from hyperosmolarity-induced ferroptosis
Source: eLife journal article supplement (doi:10.7554/elife.80647), 2023-02-01
Supplement: supp [file Figure 4K.xlsx]

## Sheet: Sheet1
WT-WD	KO-WD
6.4195	26.544
6.3992	18.087
7.5456	17.9367
5.54567	15.143
7.12675	12.467
4.3625	10.0835
two-tailed Student’s t test, n=6. six biological replicates.
