# Supplementary material for: Neutral amino acid transporter SLC38A2 protects renal medulla from hyperosmolarity-induced ferroptosis
Source: eLife journal article supplement (doi:10.7554/elife.80647), 2023-02-01
Supplement: supp [file Figure 4N.xlsx]

## Sheet: Sheet1
WT-WD	KO-WD
7.914	14.251
5.747	14.319
1.656	10.287
0.447	7.553
two-tailed Student’s t test, n=4. four biological replicates.
