# Supplementary material for: Neutral amino acid transporter SLC38A2 protects renal medulla from hyperosmolarity-induced ferroptosis
Source: eLife journal article supplement (doi:10.7554/elife.80647), 2023-02-01
Supplement: supp [file Figure 5-figure supplement 1C.xlsx]

## Sheet: Sheet1
600 mOsm	900 mOsm
0.619542	37.6254
0.532844	32.3737
1.44208	18.8116
1.75664	16.0267
0.539827	26.7896
1.10907	30.1824
two-tailed Student’s t test, n=6. six biological replicates.
