# Supplementary material for: Neutral amino acid transporter SLC38A2 protects renal medulla from hyperosmolarity-induced ferroptosis
Source: eLife journal article supplement (doi:10.7554/elife.80647), 2023-02-01
Supplement: supp [file Figure 5-figure supplement 1E.xlsx]

## Sheet: Sheet1
600 mOsm	900 mOsm
0.917322	2.23772
0.945178	2.15462
1.1375	1.9248
two-tailed Student’s t test, n=3. three biological replicates.
