# Supplementary material for: Neutral amino acid transporter SLC38A2 protects renal medulla from hyperosmolarity-induced ferroptosis
Source: eLife journal article supplement (doi:10.7554/elife.80647), 2023-02-01
Supplement: supp [file Figure 5A.xlsx]

## Sheet: Sheet1
300	400	500	600	700	800
1.07079	1.56981	8.65069	16.1371	3.08573	0.70347
0.755116	2.23312	14.0066	20.247	4.69268	0.82058
1.17409	2.85057	4.32358	18.9494	3.62346	0.82036
1.06768	1.78322	6.84231	10.371	1.60713	0.580144
0.879334	1.36083	4.04036	10.4431	1.99237	0.608987
1.05298	1.23498	4.77163	10.4431	3.1481	0.639264
one-way ANOVA tests, n=6. six biological replicates.
