# Supplementary material for: Neutral amino acid transporter SLC38A2 protects renal medulla from hyperosmolarity-induced ferroptosis
Source: eLife journal article supplement (doi:10.7554/elife.80647), 2023-02-01
Supplement: supp [file Figure 5C.xlsx]

## Sheet: Sheet1
300	400	500	600	700	800
0.609909	1.1057	1.01883	3.47771	0.086608	0.137087
1.13915	1.26042	2.03879	3.37152	0.615285	0.660627
1.25094	1.43437	2.49737	5.507	0.493608	0.217961
one-way ANOVA tests, n=3. three biological replicates.
