# Supplementary material for: Neutral amino acid transporter SLC38A2 protects renal medulla from hyperosmolarity-induced ferroptosis
Source: eLife journal article supplement (doi:10.7554/elife.80647), 2023-02-01
Supplement: supp [file Figure 5D.xlsx]

## Sheet: Sheet1
0	30	60	90	120	180
1.2356	1.15286	1.40953	2.28979	2.25826	2.89831
1.19351	1.37099	1.64173	1.39979	3.74565	4.2729
0.942924	0.989803	1.35211	1.63039	2.19651	3.61805
0.885899	1.17708	1.35211	1.96593	2.68554	2.87829
0.556793	0.91714	1.25285	1.74741	1.82161	2.32175
1.18527	1.37099	1.61912	2.24267	1.97961	3.82435
one-way ANOVA tests, n=6. six biological replicates.
