# Supplementary material for: Neutral amino acid transporter SLC38A2 protects renal medulla from hyperosmolarity-induced ferroptosis
Source: eLife journal article supplement (doi:10.7554/elife.80647), 2023-02-01
Supplement: supp [file Figure 5E.xlsx]

## Sheet: Sheet1
0	3	6	9	12
1.07193	2.69486	8.28332	1.64742	2.12905
0.913964	2.17379	9.31922	2.47978	1.98647
1.01411	2.82884	6.96542	1.67042	2.42874
one-way ANOVA tests, n=3. three biological replicates.
