# Supplementary material for: Neutral amino acid transporter SLC38A2 protects renal medulla from hyperosmolarity-induced ferroptosis
Source: eLife journal article supplement (doi:10.7554/elife.80647), 2023-02-01
Supplement: supp [file Figure 5G.xlsx]

## Sheet: Sheet1
0	3	6	9	12	24
1	0.937173	0.746606	1.49254	2.22267	1.10964
1	1.00868	0.775521	1.69687	2.85688	1.43207
1	1.10977	1.09843	1.50765	2.40663	1.65675
1	0.99498	0.767244	1.7468	2.87509	1.43122
1	1.3249	1.83358	2.1864	2.91075	3.33616
1	0.850643	1.19865	1.50662	2.61413	3.02827
1	0.992712	1.9141	1.30177	2.56734	2.28376
1	0.897962	1.3562	1.25195	1.47277	3.19674
1	0.963589	1.7102	0.782138	2.36252	2.01934
one-way ANOVA tests, n=9. nine biological replicates.
