# Supplementary material for: Neutral amino acid transporter SLC38A2 protects renal medulla from hyperosmolarity-induced ferroptosis
Source: eLife journal article supplement (doi:10.7554/elife.80647), 2023-02-01
Supplement: supp [file Figure 6D.xlsx]

## Sheet: Sheet1
	(-)473bp
pcDNA3.0	1.12249	0.957045	0.905212	1.01525
pcNF-κB	1.21905	1.13731	1.38243	1.67441
	(-)961bp
pcDNA3.0	1.10347	0.9305	0.894532	1.0715
pcNF-κB	2.39603	2.41634	2.38411	2.25894
	(-)1435bp
pcDNA3.0	0.755771	0.903204	1.11128	1.22974
pcNF-κB	1.82371	2.33648	1.87882	1.86692
two-tailed Student’s t test, n=4. four biological replicates.
