# Supplementary material for: Neutral amino acid transporter SLC38A2 protects renal medulla from hyperosmolarity-induced ferroptosis
Source: eLife journal article supplement (doi:10.7554/elife.80647), 2023-02-01
Supplement: supp [file Figure 6E.xlsx]

## Sheet: Sheet1
pcDNA3.0+Slc38a2 pro	pcNF-κB+Slc38a2 pro	pcNF-κB+Slc38a2 pro(MUT)
0.740328	3.01141	1.19269
0.910616	4.10931	1.35575
1.00082	1.89474	1.73143
1.34824	2.07572	1.64621
one-way ANOVA tests, n=4. four biological replicates.
