# Supplementary material for: Neutral amino acid transporter SLC38A2 protects renal medulla from hyperosmolarity-induced ferroptosis
Source: eLife journal article supplement (doi:10.7554/elife.80647), 2023-02-01
Supplement: supp [file Figure 6G.xlsx]

## Sheet: Sheet1
	IP-NF-κB			IP-IgG
300 mOsm	0.174343	0.11908	0.479632	0.174343	0.11908	0.479632
600 mOsm	0.955603	0.63728	1.56917	0.15908	0.18608	0.269168
one-way ANOVA tests, n=3. three biological replicates.
