# Supplementary material for: Neutral amino acid transporter SLC38A2 protects renal medulla from hyperosmolarity-induced ferroptosis
Source: eLife journal article supplement (doi:10.7554/elife.80647), 2023-02-01
Supplement: supp [file Figure 6H.xlsx]

## Sheet: Sheet1
300mOsm+DMSO	600mOsm+DMSO	300mOsm+PDTC	600mOsm+PDTC
1.10893	7.94016	0.746994	1.11664
0.938981	8.107	0.641343	1.59016
0.952089	8.39289	0.506688	1.21349
one-way ANOVA tests, n=3. three biological replicates.
