# Supplementary material for: Neutral amino acid transporter SLC38A2 protects renal medulla from hyperosmolarity-induced ferroptosis
Source: eLife journal article supplement (doi:10.7554/elife.80647), 2023-02-01
Supplement: supp [file Figure 6J.xlsx]

## Sheet: Sheet1
300mOsm-DMSO	600mOsm-DMSO	300mOsm-PDTC	600mOsm-PDTC
1.24077	5.81875	0.720633	1.05108
0.759227	6.38771	0.74169	1.46746
1.20244	7.36107	0.613488	1.5055
0.797562	7.16976	0.67016	1.62779
one-way ANOVA tests, n = 4. four biological replicates.
