# Supplementary material for: Neutral amino acid transporter SLC38A2 protects renal medulla from hyperosmolarity-induced ferroptosis
Source: eLife journal article supplement (doi:10.7554/elife.80647), 2023-02-01
Supplement: supp [file Figure 7A.xlsx]

## Sheet: Sheet1
Ad-GFP	Ad-SLC38A2
1.1782	24.6794
1.0062	34.5815
0.895549	10.7885
1.10673	21.8021
0.837011	39.8466
0.976308	25.6043
two-tailed Student’s t test, n=6. six biological replicates.
