# Supplementary material for: Neutral amino acid transporter SLC38A2 protects renal medulla from hyperosmolarity-induced ferroptosis
Source: eLife journal article supplement (doi:10.7554/elife.80647), 2023-02-01
Supplement: supp [file Figure 7D.xlsx]

## Sheet: Sheet1
	Ad-GFP
300mOsm	106.302	106.72	94.646	94.2885	98.0428
600mOsm	72.084	68.7945	71.0828	71.5119	77.0183
	Ad-SLC38A2
300mOsm	103.263	105.838	97.6853	97.5065	102.62
600mOsm	85.7785	84.4556	87.8881	86.2076	89.7832
one-way ANOVA tests, n=5. five biological replicates.
