# Supplementary material for: Neutral amino acid transporter SLC38A2 protects renal medulla from hyperosmolarity-induced ferroptosis
Source: eLife journal article supplement (doi:10.7554/elife.80647), 2023-02-01
Supplement: supp [file Figure 7F.xlsx]

## Sheet: Sheet1
300-GFP	600-GFP	300-SLC38A2	600-SLC38A2
0.924244	1.24071	1.98391	2.9099
1.07576	0.981518	1.99122	3.08117
0.92211	1.23693	1.933	2.81931
1.07789	0.975985	1.94126	2.94313
one-way ANOVA tests, n=4. four biological replicates.
