# Supplementary material for: Neutral amino acid transporter SLC38A2 protects renal medulla from hyperosmolarity-induced ferroptosis
Source: eLife journal article supplement (doi:10.7554/elife.80647), 2023-02-01
Supplement: supp [file Figure 7G.xlsx]

## Sheet: Sheet1
	Ad-GFP-300mOsm
0	100.334	93.2023	108.981	97.4826	105.306	98.3859	101.591	94.7166
1	96.345	99.8378	93.4867	87.8502	99.5392	94.0947	92.653	95.6099
2	100.669	92.619	91.8096	87.7408	99.788	90.6346	89.5604	88.5597
5	89.3815	81.171	91.6492	90.7596	96.441	90.8212	90.8551	92.7039
10	83.57	84.7002	83.5554	76.92	95.1689	90.9625	90.9738	87.1859
20	84.2992	81.9294	88.6888	80.9523	96.2318	89.5152	91.4148	88.5201
	Ad-GFP-600mOsm
0	77.1679	77.3648	82.6148	85.4804	71.5025	70.3435	71.6099	74.5781
1	76.9127	78.1304	70.6273	71.4512	71.853	70.0325	71.1406	74.0466
2	74.5429	70.1314	76.8033	73.1794	69.8855	69.7611	69.1336	64.1187
5	68.4106	69.6064	74.8127	68.7606	62.8749	64.9159	57.6113	60.4099
10	63.4741	55.3731	53.4335	55.5408	52.1781	49.8318	49.9392	53.2806
20	47.2428	42.0949	42.9335	34.6793	51.5901	47.6269	39.8021	42.5102
	Ad-SLC38A2-300mOsm
0	105.635	108.034	107.793	99.0284	104.266	103.621	104.102	101.97
1	106.998	98.0513	101.85	107.049	102.756	102.745	101.06	100.636
2	104.402	102.776	105.35	99.7794	101.88	102.445	96.0509	97.6452
5	106.408	99.5753	96.2721	100.326	98.0014	93.2466	62.824	97.0629
10	98.3867	96.9065	96.2138	95.893	99.1491	95.9322	87.6325	86.7109
20	92.3419	91.1315	90.7523	97.9419	96.8763	91.1039	87.576	87.4855
	Ad-SLC38A2-600mOsm
0	103.666	94.4128	95.6596	97.0086	75.0078	80.5993	80.8367	83.4997
1	90.6429	92.5169	96.8482	94.0336	74.7307	75.5449	76.2064	75.2678
2	107.625	89.2794	91.6638	97.9492	74.5611	76.0367	74.4368	81.3117
5	88.5502	90.6794	89.5273	93.5086	73.877	78.0551	75.641	80.7011
10	83.2054	83.9346	87.1283	93.195	73.9788	75.2	75.3413	79.6664
20	100.895	72.946	92.1086	96.5419	73.7187	76.5512	77.5237	82.759
two-way ANOVA tests, n=8. eight biological replicates.
