# Supplementary material for: Neutral amino acid transporter SLC38A2 protects renal medulla from hyperosmolarity-induced ferroptosis
Source: eLife journal article supplement (doi:10.7554/elife.80647), 2023-02-01
Supplement: supp [file Figure 7H.xlsx]

## Sheet: Sheet1
	Ad-GFP-300mOsm			Ad-GFP-600mOsm
0	102.181	98.2667	99.5524	45.2287	42.5748	40.2314
60	60.4801	63.0136	67.5485	36.6465	32.3523	41.2954
125	63.8179	62.4689	65.2303	40.6621	39.1103	39.978
250	66.3704	61.3541	56.7559	21.9271	16.6195	13.953
500	52.4807	50.7009	40.3391	15.2578	14.3901	14.1684
1000	51.4863	46.47	49.0985	16.1952	16.0621	14.5738
	Ad-SLC38A2-300mOsm			Ad-SLC38A2-600mOsm
0	99.7804	103.771	105.411	52.316	54.1084	49.9789
60	70.5823	73.6984	78.5754	40.187	46.2104	41.9035
125	74.1988	62.4372	57.4399	39.9527	38.7683	39.351
250	55.4702	56.7052	60.3281	19.647	15.6505	10.1782
500	62.8742	54.1528	44.1329	10.0135	17.1959	10.2795
1000	52.829	52.4807	47.6291	10.5962	10.3239	9.0698
two-way ANOVA tests, n=3. three biological replicates.
