# Supplementary material for: Neutral amino acid transporter SLC38A2 protects renal medulla from hyperosmolarity-induced ferroptosis
Source: eLife journal article supplement (doi:10.7554/elife.80647), 2023-02-01
Supplement: supp [file Figure 8-figure supplement 1A.xlsx]

## Sheet: Sheet1
siNC	siRNA-Slc38a2
0.890895	0.474121
0.866534	0.29593
1.24257	0.356835
two-tailed Student’s t test, n=3. three biological replicates.
