# Supplementary material for: Neutral amino acid transporter SLC38A2 protects renal medulla from hyperosmolarity-induced ferroptosis
Source: eLife journal article supplement (doi:10.7554/elife.80647), 2023-02-01
Supplement: supp [file Figure 8A.xlsx]

## Sheet: Sheet1
	Control												MeAIB
300 mOsm	91.7408	91.9658	94.1568	88.2293	100.87	79.5576	99.6121	104.547	105.042	107.199	112.832	124.248	77.9752	85.2195	73.431	80.4392	82.5675	75.799	81.4129	100.995	83.5892	76.4777	74.6077	79.5797
600 mOsm	70.1814	67.4114	68.1491	70.4175	66.954	76.6916	65.7884	65.1097	71.4576	73.088	61.886	96.569	48.172	53.3028	50.4221	49.9093	49.1901	47.4712	52.2737	63.3171	49.8724	47.1946	49.168	2.9656
											one-way ANOVA tests. n=12. twelve biological replicates.
