# Supplementary material for: Neutral amino acid transporter SLC38A2 protects renal medulla from hyperosmolarity-induced ferroptosis
Source: eLife journal article supplement (doi:10.7554/elife.80647), 2023-02-01
Supplement: supp [file Figure 8B.xlsx]

## Sheet: Sheet1
	siNC			siRNA-SLC38A2
300mOsm	99.8038	101.185	99.0113	97.5428	93.4987	110.718
600mOsm	55.6913	53.5877	51.0878	29.0024	31.106	29.789
one-way ANOVA tests, n=3. three biological replicates.
