# Supplementary material for: Neutral amino acid transporter SLC38A2 protects renal medulla from hyperosmolarity-induced ferroptosis
Source: eLife journal article supplement (doi:10.7554/elife.80647), 2023-02-01
Supplement: supp [file Figure 8D.xlsx]

## Sheet: Sheet1
	SLC38A2+/+			SLC38A2-/-
600 mOsm	105.615	101.446	92.9381	97.9098	91.9928	90.2584
900 mOsm	90.4285	85.1916	90.2584	58.633	58.633	72.0585
one-way ANOVA tests, n=3. three biological replicates.
