# Supplementary material for: Neutral amino acid transporter SLC38A2 protects renal medulla from hyperosmolarity-induced ferroptosis
Source: eLife journal article supplement (doi:10.7554/elife.80647), 2023-02-01
Supplement: supp [file Figure 8F.xlsx]

## Sheet: Sheet1
SLC38A2+/+			SLC38A2-/-
600mOsm	900mOsm	1200mOsm	600mOsm	900mOsm	1200mOsm
1	0.706749	0.869164	0.461117	0.375887	0.438918
1	0.971894	0.834811	0.960029	0.624816	0.672713
1	0.836783	0.785953	0.659599	0.37078	0.444537
1	0.929899	0.986406	0.942328	0.770381	0.551069
1	0.959235	0.717098	0.773786	0.727901	0.631911
one-way ANOVA tests, n=5. five biological replicates.
