# Supplementary material for: Neutral amino acid transporter SLC38A2 protects renal medulla from hyperosmolarity-induced ferroptosis
Source: eLife journal article supplement (doi:10.7554/elife.80647), 2023-02-01
Supplement: supp [file Figure 8G.xlsx]

## Sheet: Sheet1
	WT-Ad-GFP			WT-Ad-SLC38A2
600mOsm	114.386	90.0391	95.5744	95.5297	96.1809	146.569
900mOsm	72.2242	76.2455	71.3939	83.5839	84.6095	82.2245
1200mOsm	61.4791	45.915	43.4322	64.6456	61.3448	61.5849
	KO-Ad-GFP			KO-Ad-SLC38A2
600mOsm	75.9361	90.5275	91.6264	91.0566	93.2789	100
900mOsm	63.156	45.7969	44.5962	83.7752	88.1872	82.6844
1200mOsm	34.6652	38.7353	35.524	66.0498	65.944	62.2548
one-way ANOVA tests, n=3. three biological replicates.
