# Supplementary material for: Neutral amino acid transporter SLC38A2 protects renal medulla from hyperosmolarity-induced ferroptosis
Source: eLife journal article supplement (doi:10.7554/elife.80647), 2023-02-01
Supplement: supp [file Figure 8H.xlsx]

## Sheet: Sheet1
	WT-600mOsm			WT-900mOsm
0	100.018	97.4626	102.52	90.8446	92.6728	90.0641
1	100.05	97.5374	100.274	88.7812	90.2352	87.9366
2	96.5324	98.2965	97.623	84.7078	77.7798	80.5809
5	90.9729	90.866	87.5196	68.0506	71.1404	68.0506
10	87.8136	89.0912	85.1675	59.9359	58.7598	61.7748
20	77.0848	77.6301	76.6892	44.8717	46.3578	45.1604
	KO-600mOsm			KO-900mOsm
0	89.3478	88.7705	80.8161	73.5032	66.65	73.1718
1	86.4612	87.5517	84.5902	53.8952	53.6814	52.2381
2	72.4768	70.7021	72.4554	49.3942	49.6721	42.402
5	57.7441	56.8995	56.7712	32.7798	33.5602	32.5873
10	45.0214	45.1711	43.5567	29.6365	29.4761	29.1019
20	44.0805	42.4661	32.6621	26.4077	25.8304	25.7769
two-way ANOVA tests, n=3. three biological replicates.
