# Supplementary material for: Neutral amino acid transporter SLC38A2 protects renal medulla from hyperosmolarity-induced ferroptosis
Source: eLife journal article supplement (doi:10.7554/elife.80647), 2023-02-01
Supplement: supp [file Figure 8I.xlsx]

## Sheet: Sheet1
	WT-600mOsm			WT-900mOsm
0	99.06	99.9	101.02	90.3	89.36	88.64
60	77.54	78.01	74.94	74.51	79.09	75.15
125	47.77	49.38	48.82	42.9	41.93	41.48
250	22.91	33.52	23.07	21.98	21.36	20.97
500	23.06	27.1	27.48	21.95	21.25	21.38
1000	22.98	24.18	22.65	14.02	25.69	21.82
	KO-600mOsm			KO-900mOsm
0	84.46	87.04	90.74	60.38	61.74	52.54
60	67.87	63.39	65.19	41.96	42.96	40.62
125	43.83	42.37	40.61	31.86	29.06	26.54
250	20.35	21.43	21.37	20.88	23.05	22.69
500	18.56	21.8	21.71	20.11	19.22	21.58
1000	27.46	21.68	22.42	22.2	22.9	22.54
two-way ANOVA tests, n=3. three biological replicates.
