# Supplementary material for: Neutral amino acid transporter SLC38A2 protects renal medulla from hyperosmolarity-induced ferroptosis
Source: eLife journal article supplement (doi:10.7554/elife.80647), 2023-02-01
Supplement: supp [file Figure 8J.xlsx]

## Sheet: Sheet1
	300mOsm				600mOsm
0	99.2946	100.309	100.47	99.9265	78.4864	79.8971	80.3821	71.1903
1	95.7605	106.157	97.5312	103.909	71.3005	69.9486	74.0779	67.2741
2	95.4666	102.021	100.294	98.986	59.5591	72.5349	69.2873	67.4871
5	89.853	90.1249	92.3145	84.6657	67.7663	67.759	63.1447	56.1278
10	88.5525	92.4467	91.3373	89.8604	61.1389	64.8053	54.3791	68.3542
20	92.388	87.9794	83.3578	77.0536	60.2278	65.9589	58.097	70.1763
	300mOsm+Erastin				600mOsm+Erastin
0	92.8876	96.3409	92.1087	89.7061	61.8736	70.0955	65.3784	63.086
1	94.3424	91.6679	93.1448	74.2395	64.0338	63.0125	63.9677	52.7774
2	90.7348	81.183	77.9353	83.6444	53.5929	46.6642	42.0647	46.3777
5	89.1697	76.0985	81.4548	86.1425	33.2917	37.759	30.6098	27.4137
10	74.504	78.9052	85.878	72.7847	29.302	32.5349	25.0992	22.8655
20	71.3079	77.3182	78.7436	72.3365	16.5981	27.2447	23.0639	19.302
two-way ANOVA tests, n=4. four biological replicates.
