# Supplementary material for: Neutral amino acid transporter SLC38A2 protects renal medulla from hyperosmolarity-induced ferroptosis
Source: eLife journal article supplement (doi:10.7554/elife.80647), 2023-02-01
Supplement: supp [file Figure 9-figure supplement 1A.xlsx]

## Sheet: Sheet1
mOsm	s6
300	1	1	1	1
400	0.653986	0.884965	0.737127	0.64628
500	0.466771	0.485206	0.400803	0.395685
600	0.424777	0.323775	0.584392	0.581212
700	0.087697	0.067557	0.093393	0.090688
800	0.273341	0.133586	0.094758	0.125194
	p-s6
300	1	1	1	1
400	0.944428	0.73394	0.894104	0.86673
500	0.88423	0.825803	0.893256	0.529681
600	0.858496	0.824805	0.731249	0.352845
700	0.143058	0.194923	0.141371	0.387335
800	0.157826	0.164777	0.287117	0.300688
	4EBP1
300	1	1	1	1
400	0.936879	1.31146	0.923681	0.849699
500	0.593956	1.18233	0.966594	1.00541
600	0.667476	0.945355	0.908702	0.948352
700	0.71866	0.337003	0.63324	0.683698
800	0.087772	0.269756	0.374594	0.54412
	p-4EBP1
300	1	1	1	1
400	0.808899	1.0246	0.897159	0.824705
500	0.564266	1.03004	0.819317	0.923088
600	0.427906	0.814813	0.712381	0.687913
700	0.162809	0.374088	0.514081	0.707178
800	0.106993	0.184762	0.471005	0.476671
one-way ANOVA tests, n=4. four biological replicates.
