# Supplementary material for: Neutral amino acid transporter SLC38A2 protects renal medulla from hyperosmolarity-induced ferroptosis
Source: eLife journal article supplement (doi:10.7554/elife.80647), 2023-02-01
Supplement: supp [file Figure 9-figure supplement 1C.xlsx]

## Sheet: Sheet1
	SLC38A2
300-DMSO	1.21919	0.780809	1	1.14764	0.852364
600-DMSO	4.91352	3.2423	5.26886	4.97144	3.19767
300-Torin1	0.464466	0.540582	0.948836	0.474299	0.58293
600-Torin1	3.80858	4.47142	4.89765	3.67356	4.15938
300-rapamycin	0.808238	0.955456	1.26722	0.771474	0.982346
600-rapamycin	4.65464	5.35064	5.54089	4.24712	4.79181
	GPX4
300-DMSO	0.9404	1.0596	0.825533	1.17447	1
600-DMSO	1.45528	1.71401	1.15765	1.58812	0.8825
300-Torin1	1.84484	2.11926	2.14124	3.61698	1.46641
600-Torin1	4.45868	3.67399	4.35894	3.23635	1.66333
300-rapamycin	1.19135	0.920067	1.72194	1.41483	1.13576
600-rapamycin	2.62486	1.53444	1.65305	1.79613	0.820827
one-way ANOVA tests, n=5. five biological replicates.
