# Supplementary material for: Neutral amino acid transporter SLC38A2 protects renal medulla from hyperosmolarity-induced ferroptosis
Source: eLife journal article supplement (doi:10.7554/elife.80647), 2023-02-01
Supplement: supp [file Figure 9-figure supplement 1D.xlsx]

## Sheet: Sheet1
	s6
Ad-GFP-300mOsm	1	1	1	1
Ad-SLC38A2-300mOsm	0.910206	0.607294	0.934494	0.870103
Ad-GFP-600mOsm	0.515481	0.214126	0.757335	0.420736
Ad-SLC38A2-600mOsm	0.877471	1.1121	0.820476	0.783705
	p-s6
Ad-GFP-300mOsm	1	1	1	1
Ad-SLC38A2-300mOsm	1.18874	1.03069	0.948626	0.612115
Ad-GFP-600mOsm	0.679591	0.618537	0.709344	0.19276
Ad-SLC38A2-600mOsm	1.07132	1.13026	0.856198	0.873386
	4EBP1
Ad-GFP-300mOsm	1	1	1	1
Ad-SLC38A2-300mOsm	1.45423	0.873679	0.710581	1.17023
Ad-GFP-600mOsm	0.498367	0.909095	0.476958	0.826695
Ad-SLC38A2-600mOsm	1.30606	1.18229	0.803835	0.69004
	p-4EBP1
Ad-GFP-300mOsm	1	1	1	1
Ad-SLC38A2-300mOsm	1.03655	1.02659	0.962299	1.13611
Ad-GFP-600mOsm	0.566437	0.529184	0.462402	0.613548
Ad-SLC38A2-600mOsm	0.816414	0.838401	0.847942	0.83454
one-way ANOVA tests, n=4. four biological replicates.
