# Supplementary material for: Neutral amino acid transporter SLC38A2 protects renal medulla from hyperosmolarity-induced ferroptosis
Source: eLife journal article supplement (doi:10.7554/elife.80647), 2023-02-01
Supplement: supp [file Figure 9B.xlsx]

## Sheet: Sheet1
	300mOsm+DMSO
0	99.9097	103.848	96.7165	99.5262	103.703	99.1463	101.344	95.8071
5	95.5513	96.4142	95.4628	98.6634	100.422	95.6911	95.0302	96.5317
10	98.1914	102.107	97.2032	95.0499	100.584	93.1751	91.7779	91.233
20	92.4098	95.0204	91.6428	88.3538	97.8245	91.6909	93.4997	94.3693
50	82.8156	83.7964	89.7107	86.4881	97.0941	93.4997	91.2735	89.0879
100	88.8774	81.4218	82.2404	83.0958	98.0043	92.6359	91.0938	88.514
	600mOsm+DMSO
0	74.6373	71.009	73.0739	70.9721	77.8527	80.6702	80.8789	83.4007
5	65.574	64.1065	60.8322	65.1979	74.1423	68.9247	74.7047	74.3858
10	59.173	58.3986	54.9621	54.5639	68.0435	68.2522	68.2522	69.9335
20	55.9061	54.5786	55.0359	53.6126	66.7681	64.2057	67.6899	64.913
50	55.1391	52.3958	50.0138	56.1199	68.5537	65.0173	65.0753	63.4173
100	52.853	51.9386	53.3397	52.1746	61.7128	64.4318	63.997	65.2376
	300mOsm+Erastin
0	95.5513	96.9967	99.2755	93.1399	97.4419	93.1403	88.5372	88.7459
5	81.6062	92.2328	90.8243	89.3494	92.6765	87.8995	89.0242	88.2009
10	91.1856	91.6797	85.1164	88.8922	86.0269	87.1632	64.5883	86.8096
20	88.8332	81.2891	84.4675	85.4925	85.3081	83.9689	90.1431	91.575
50	81.3038	81.9306	78.5752	78.7227	84.8385	83.5804	83.2964	83.7022
100	79.2906	84.674	78.3245	79.3569	79.2614	79.0237	85.053	84.6008
	600mOsm+Erastin
0	68.8114	63.8041	65.456	60.9355	69.0465	69.0813	69.5914	74.3163
5	51.7173	47.3074	44.9033	45.0582	58.246	57.4982	53.6603	52.1704
10	44.3723	40.6998	37.7427	38.5539	50.5181	41.6018	45.028	46.9064
20	30.8401	37.2264	33.989	31.8652	45.1324	36.448	36.0132	34.645
50	34.7339	33.6203	28.1337	27.6175	38.935	39.7235	33.729	26.836
100	32.5879	34.0554	27.4479	30.9065	34.245	30.8129	30.1752	25.5779
two-way ANOVA tests, n=8. eight biological replicates.
