# Supplementary material for: Neutral amino acid transporter SLC38A2 protects renal medulla from hyperosmolarity-induced ferroptosis
Source: eLife journal article supplement (doi:10.7554/elife.80647), 2023-02-01
Supplement: supp [file Figure 9C.xlsx]

## Sheet: Sheet1
	300mOsm+DMSO
0	99.826	106.426	97.9683	95.7795	92.9848	103.454	91.9276	111.633
5	87.3081	99.8396	95.6241	96.1983	95.973	108.344	100.782	102.683
10	93.7664	94.5635	92.2261	90.6723	97.3973	97.5001	103.418	91.3329
50	86.0651	90.4899	83.2008	87.4229	95.4517	90.2757	107.191	88.3521
100	80.5864	86.3218	83.3561	84.3627	89.0349	84.0865	85.5916	82.9558
500	79.2285	70.318	68.0076	70.041	75.0486	76.2233	70.3352	88.1979
	600mOsm+DMSO
0	63.4139	67.0348	65.6162	71.4935	74.3218	83.5505	68.8668	73.1324
5	59.5227	61.5561	61.4143	63.0221	67.9637	64.2047	69.5569	72.3395
10	58.4148	54.4358	52.0714	54.8412	67.2589	57.9788	67.6627	63.9184
50	52.6524	49.1598	51.4296	49.5381	65.7465	56.0332	64.5277	68.1473
100	41.2761	44.2891	36.3108	38.8509	62.8611	62.5821	61.5029	66.187
500	37.5201	44.4985	33.9396	35.2975	58.6909	63.6541	57.9054	65.7905
	300mOsm+Erastin
0	87.2811	94.219	89.4023	85.707	97.8231	90.797	93.2051	93.7924
5	78.2828	85.707	83.3696	88.4498	90.7603	91.1861	87.3463	85.2318
10	78.7624	87.0514	84.4167	78.8705	87.9997	78.8884	90.0554	84.9895
50	74.8374	75.6143	80.8161	83.3494	75.2616	84.9381	88.2787	91.8909
100	77.9382	72.4663	81.674	69.96	86.2744	66.8037	85.6283	81.1351
500	61.5224	59.4619	62.8127	58.0095	81.6196	66.3999	78.213	61.4662
	600mOsm+Erastin
0	58.6378	62.9478	58.0365	51.916	54.8144	62.5454	66.4807	62.1343
5	51.3959	40.9654	52.2403	47.1872	51.9438	55.901	63.2209	51.1582
10	29.7107	35.946	37.6011	32.9398	52.3696	50.7397	33.4643	43.6915
50	31.1631	28.9068	25.0832	32.5953	41.3201	30.3073	32.8843	28.2001
100	21.1515	18.6992	24.9008	19.7936	26.673	23.516	27.187	35.5861
500	23.7321	13.8082	13.9974	16.2537	24.911	16.2329	31.0121	18.1271
two-way ANOVA tests, n=8. eight biological replicates.
