# Supplementary material for: Neutral amino acid transporter SLC38A2 protects renal medulla from hyperosmolarity-induced ferroptosis
Source: eLife journal article supplement (doi:10.7554/elife.80647), 2023-02-01
Supplement: supp [file Figure 9D.xlsx]

## Sheet: Sheet1
300+DMSO	600m+DMSO	600+Torin1	600+rapamycin
125.508	108.727	88.7325	91.6164
106.886	108.737	91.8171	95.6122
100.907	101.134	92.2602	90.3925
154.021	115.793	83.507	93.2739
139.829	117.894	81.5026	87.3244
165.201	122.32	82.2711	74.6125
one-way ANOVA tests, n=6. six biological replicates.
