# Supplementary material for: Neutral amino acid transporter SLC38A2 protects renal medulla from hyperosmolarity-induced ferroptosis
Source: eLife journal article supplement (doi:10.7554/elife.80647), 2023-02-01
Supplement: supp [file Figure 9E.xlsx]

## Sheet: Sheet1
300+DMSO	600+DMSO	600+Torin1	600+Rapamycin
1.13793	7.30603	56.7026	19.3319
1.15733	6.78879	56.25	18.2328
0.704741	7.69397	58.3836	14.9353
one-way ANOVA tests, n=3. three biological replicates.
