# Supplementary material for: Neutral amino acid transporter SLC38A2 protects renal medulla from hyperosmolarity-induced ferroptosis
Source: eLife journal article supplement (doi:10.7554/elife.80647), 2023-02-01
Supplement: supp [file Figure 9G.xlsx]

## Sheet: Sheet1
	300 mOsm												600 mOsm
Ad-GFP	101.393	96.0787	95.4263	102.217	100.028	102.131	96.7398	97.7012	108.286	97.6411	98.4395	104.406	70.6855	73.321	65.5004	60.53	73.2008	72.6857	64.9081	67.4234	61.1652	62.0924	71.0461	67.2259
Ad-SLC38A2	97.2377	109.033	104.243	93.4433	95.6238	100.105	97.0746	95.0915	97.7871	98.1648	99.5469	94.6108	75.5444	75.3985	76.7033	80.3947	87.6744	79.0212	76.2655	80.2144	77.5618	70.4537	80.7553	76.008
Ad-SLC38A2+rapamycin	92.6106	98.3966	95.3491	93.5463	92.705	92.602	91.4173	89.6317	88.4127	91.2628	93.7352	97.2119	71.7071	72.2393	64.5304	72.8918	68.7368	70.2048	70.8057	70.9173	68.4707	68.093	67.2774	65.8524
one-way ANOVA tests, n=12. twelve biological replicates.
