# Supplementary material for: Neutral amino acid transporter SLC38A2 protects renal medulla from hyperosmolarity-induced ferroptosis
Source: eLife journal article supplement (doi:10.7554/elife.80647), 2023-02-01
Supplement: supp [file Figure 9H.xlsx]

## Sheet: Sheet1
	300mOsm									600mOsm
Ad-GFP	91.332	96.5307	96.7768	90.3168	82.0727	95.6694	118.095	115.418	113.788	70.66	76.7816	78.1044	73.0902	72.3212	71.0292	69.0604	71.1522	69.1219
Ad-SLC38A2	97.3306	99.3916	102.96	94.8388	95.208	97.3306	97.146	98.8379	97.9766	86.164	91.2089	94.039	91.9165	87.5483	85.4257	89.6093	88.102	88.871
Ad-SLC38A2+Torin-1	86.9946	90.8706	91.7934	83.9799	97.8227	82.5956	86.7485	87.9789	89.8554	69.4295	70.1678	70.66	76.8431	68.076	68.4759	68.8143	58.6629	61.493
one-way ANOVA tests, n=9. nine biological replicates.
