# Supplementary material for: Neutral amino acid transporter SLC38A2 protects renal medulla from hyperosmolarity-induced ferroptosis
Source: eLife journal article supplement (doi:10.7554/elife.80647), 2023-02-01
Supplement: supp [file Figure1-figure supplement 2E.xlsx]

## Sheet: Sheet1
ISO	HYPER
483.268	693.123
364.453	778.673
414.2	884.372
616.082	565.295
two-tailed Student’s t test, n=4. four biological replicates.
