# Supplementary material for: Neutral amino acid transporter SLC38A2 protects renal medulla from hyperosmolarity-induced ferroptosis
Source: eLife journal article supplement (doi:10.7554/elife.80647), 2023-02-01
Supplement: supp [file Figure1-figure supplement 2F.xlsx]

## Sheet: Sheet1
ISO	HYPER
4175.91	5243.02
4303.1	5055.14
4240.93	4705.6
4123.85	5159.87
two-tailed Student’s t test, n=4. four biological replicates.
