# Supplementary material for: Neutral amino acid transporter SLC38A2 protects renal medulla from hyperosmolarity-induced ferroptosis
Source: eLife journal article supplement (doi:10.7554/elife.80647), 2023-02-01
Supplement: supp [file Figure1-figure supplement 2G.xlsx]

## Sheet: Sheet1
ISO	HYPER
5311.05	7218.15
4512.27	7776.35
4434.16	12450.6
6619.02	6666.2
two-tailed Student’s t test, n=4. four biological replicates.
