# Supplementary material for: Neutral amino acid transporter SLC38A2 protects renal medulla from hyperosmolarity-induced ferroptosis
Source: eLife journal article supplement (doi:10.7554/elife.80647), 2023-02-01
Supplement: supp [file Figure1-figure supplement 2H.xlsx]

## Sheet: Sheet1
ISO	HYPER
1009.67	1845.1
950.865	1720.35
998.518	2053.52
1049.79	1834.67
two-tailed Student’s t test, n=4. four biological replicates.
