# Supplementary material for: Neutral amino acid transporter SLC38A2 protects renal medulla from hyperosmolarity-induced ferroptosis
Source: eLife. 2023 Feb 1;12:e80647. doi: 10.7554/eLife.80647 (PMC9949798; doi:10.7554/eLife.80647)
Supplement: Supplementary file 1. [file elife-80647-supp1.xlsx]

## Sheet: Sheet1
Primer pairs used for real-time PCR to determine the mRNA levels of Slc38a2.
Gene Name	Forward primer sequence 5′- 3′	Reverse primer sequence (5′- 3′)
Slc38a2	TAATCTGAG CAATGCGATTGTGG	AGATGGACGGAGTATAGCGAAAA
β-actin	AGCCATGTACGTAGCCATCC	GCTGTGGTGGTGAAGCTGTA
β-actin was used as a loading control.
