# Supplementary figures and images for: Neutral amino acid transporter SLC38A2 protects renal medulla from hyperosmolarity-induced ferroptosis
Source: eLife journal article supplement (doi:10.7554/elife.80647), 2023-02-01

SNAT2 WT 禁水 24h 高通量 4

Con      WD

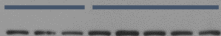

$\beta$ -actin

18-3-26

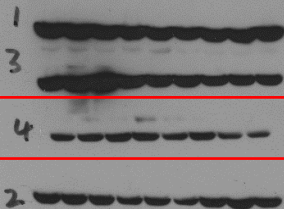

Medulla

Con

WD

SNAT2

56 kDa

$\beta$ -actin

43 kDa

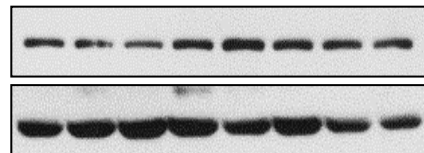

Supplement: fig3-data1 [file elife-80647-fig3-data1-v2.zip]

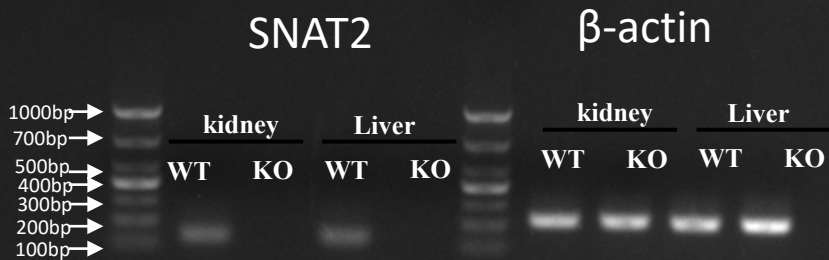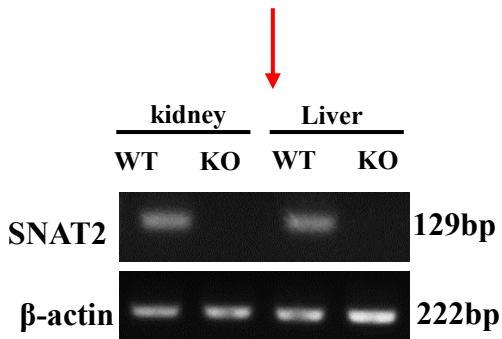

Supplement: fig4-data1 [file elife-80647-fig4-data1-v2.zip]

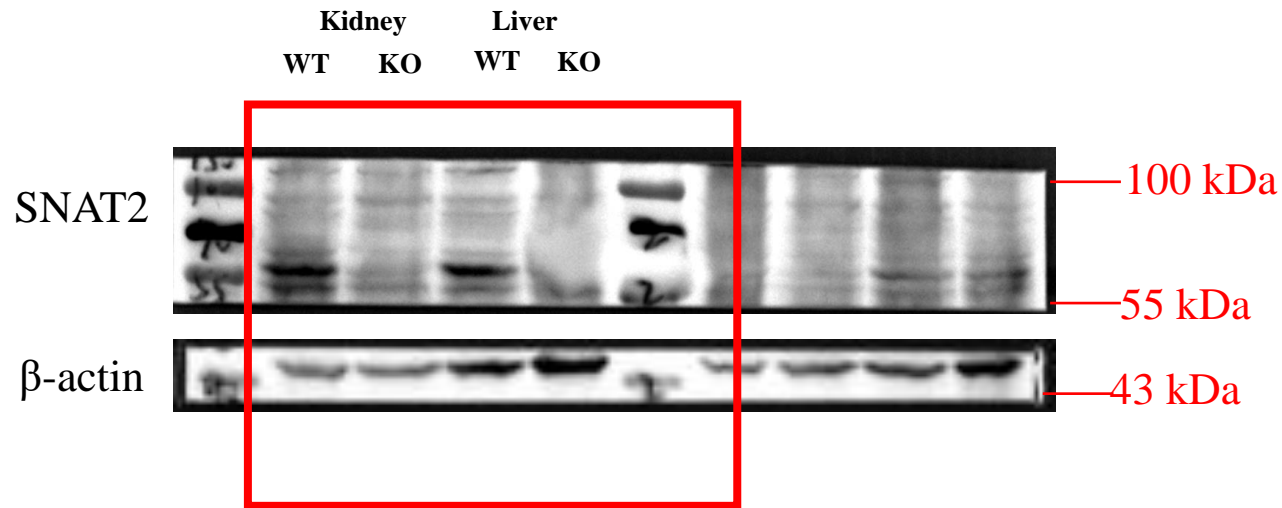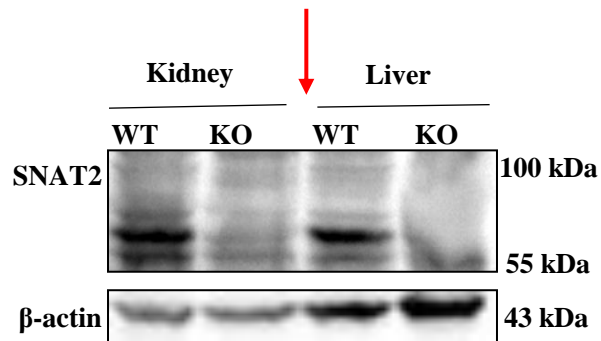

Supplement: fig4-data1 [file elife-80647-fig4-data1-v2.zip]

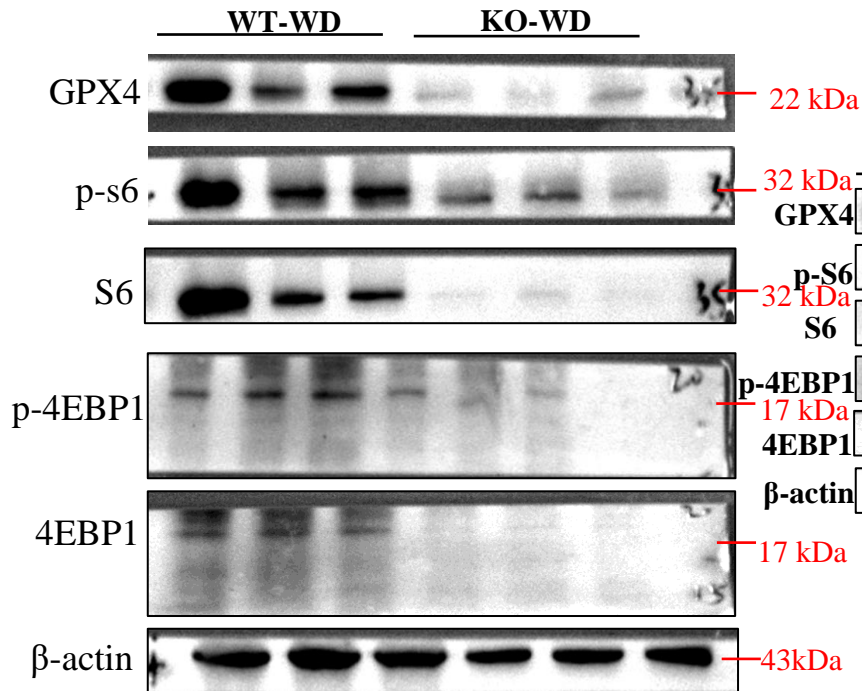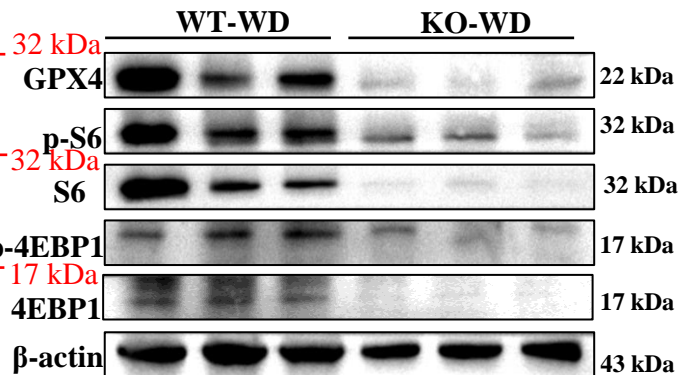

Supplement: fig4-data1 [file elife-80647-fig4-data1-v2.zip]

hours      0      3      6      9      12      24

SNAT2

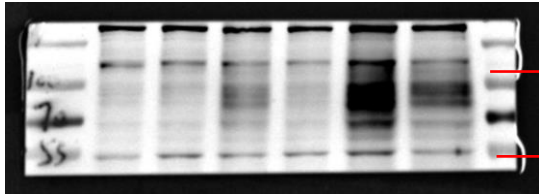

100kDa

55kDa

$\beta$ -actin

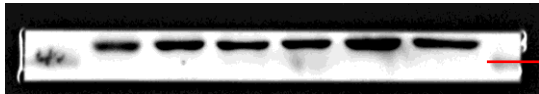

40kDa

hours

0      3      6      9      12      24

SNAT2

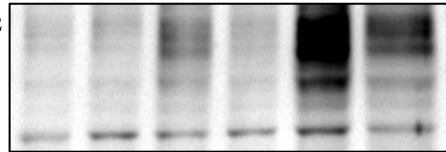

100 kDa

55 kDa

$\beta$ -actin

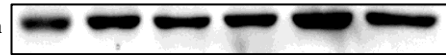

43 kDa

Supplement: fig5-data1 [file elife-80647-fig5-data1-v2.zip]

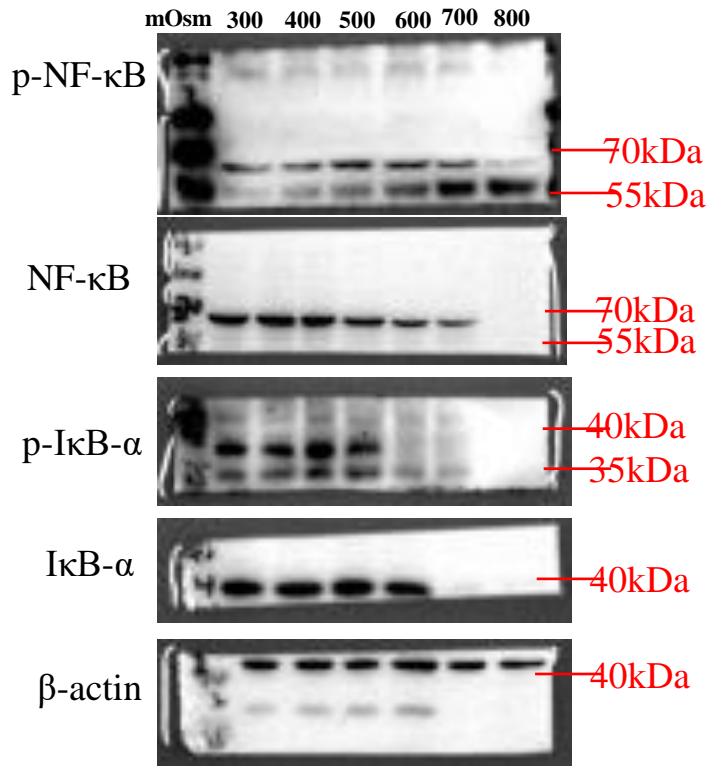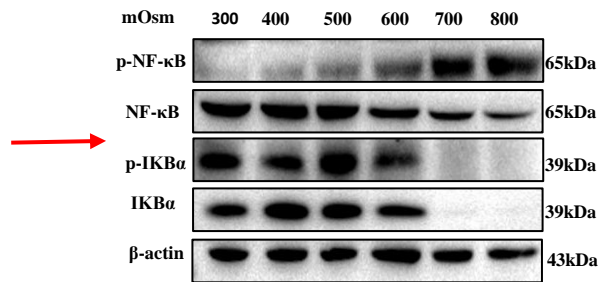

Supplement: fig6-data1 [file elife-80647-fig6-data1-v2.zip]

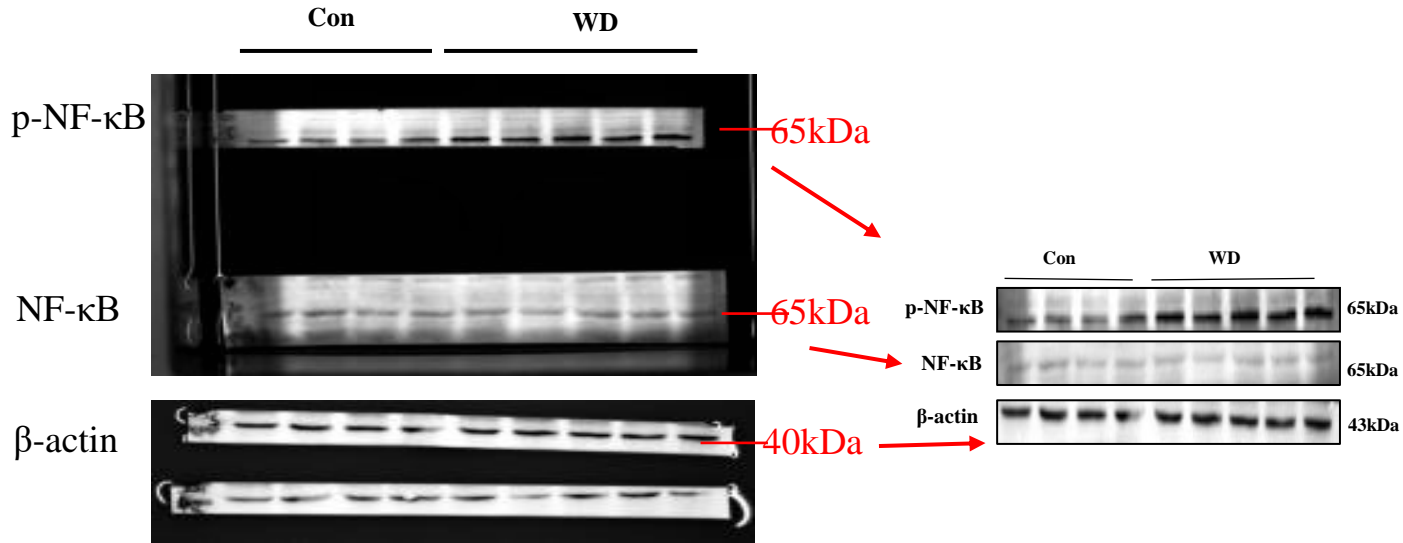

Supplement: fig6-data1 [file elife-80647-fig6-data1-v2.zip]

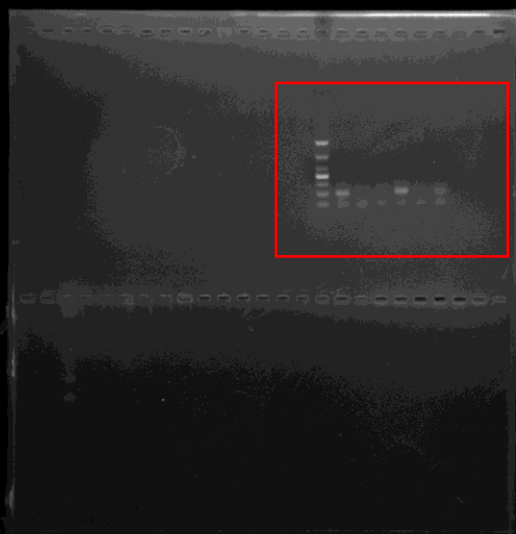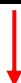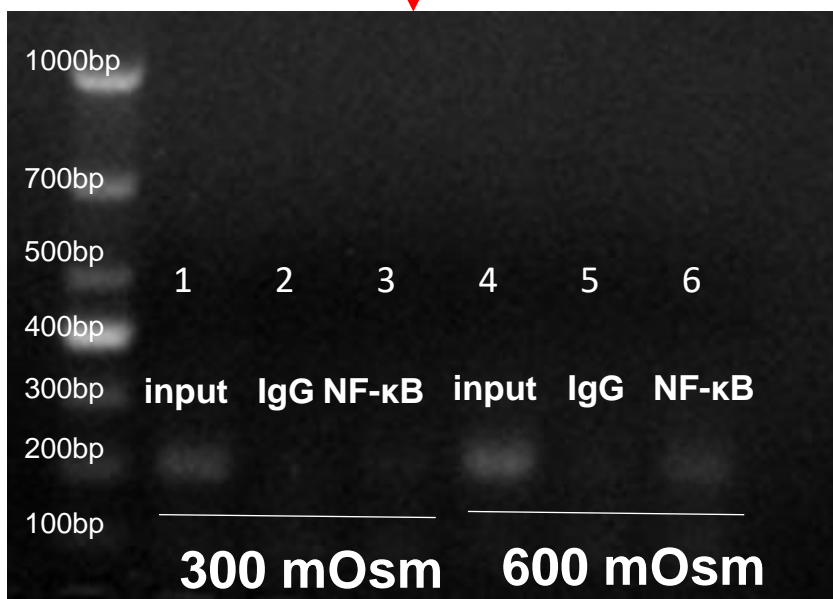

Supplement: fig6-data1 [file elife-80647-fig6-data1-v2.zip]

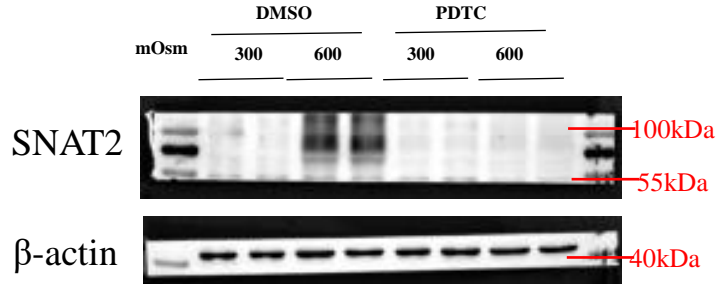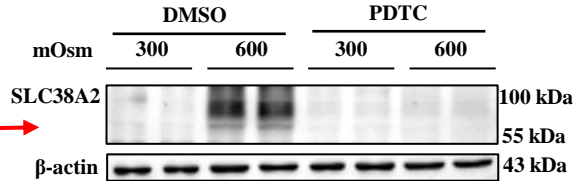

Supplement: fig6-data1 [file elife-80647-fig6-data1-v2.zip]

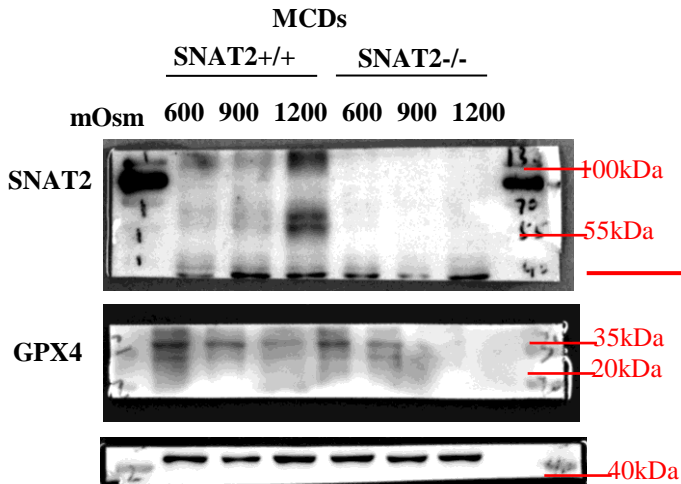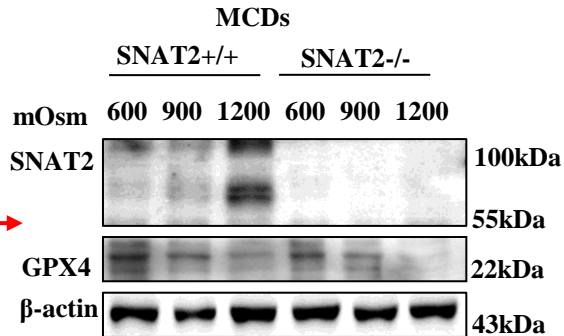

Supplement: fig8-data1 [file elife-80647-fig8-data1-v2.zip]

| mOsm | DMSO |     | Torin1 |     | Rapamycin |     |
|------|------|-----|--------|-----|-----------|-----|
|      | 300  | 600 | 300    | 600 | 300       | 600 |

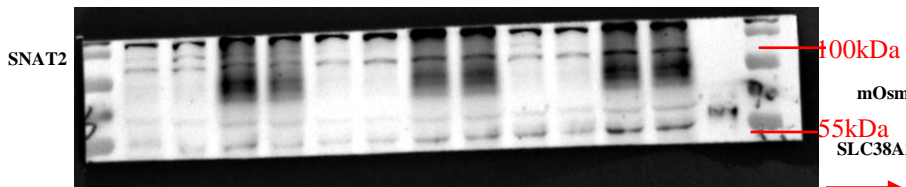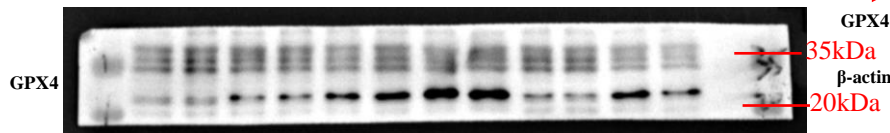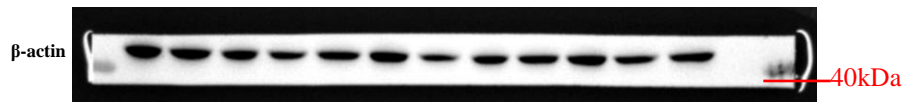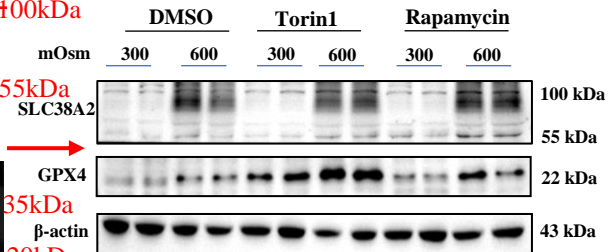

Supplement: fig9-figsupp1-data1 [file Figure 9-figure supplement 1B-uncroped gels or blots.pdf › Figure 9-figure supplement 1-source data-1/Uncropped gels or blots/Figure 9-figure supplement 1B-uncroped gels or blots.pdf]

**Control(Pex3)**

**p-SNAT2-C-EGFP**

SNAT2

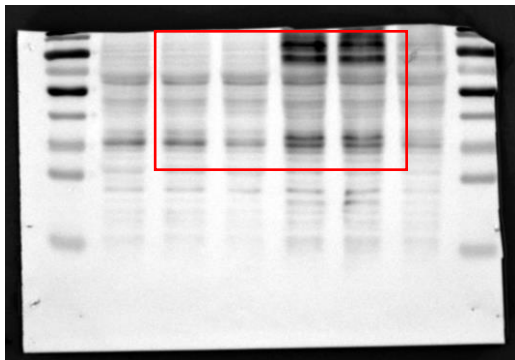

$\beta$ -actin

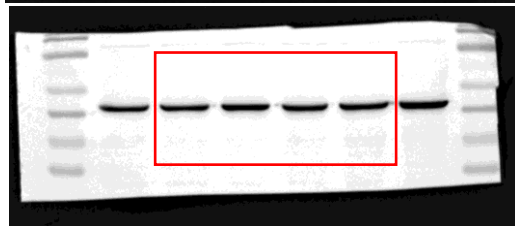

**Control(Pex3)**

**p-SNAT2-C-EGFP**

SNAT2

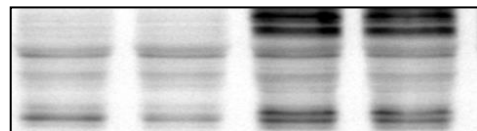

100 kDa

55 kDa

$\beta$ -actin

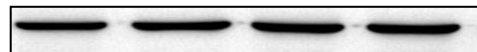

43 kDa

Supplement: supp [file Figure 2-figure supplement 4B-uncropped gels or blots.pdf › Figure 2-figure supplement 4-source data-1/Uncropped gels or blots/Figure 2-figure supplement 4B-uncropped gels or blots.pdf]

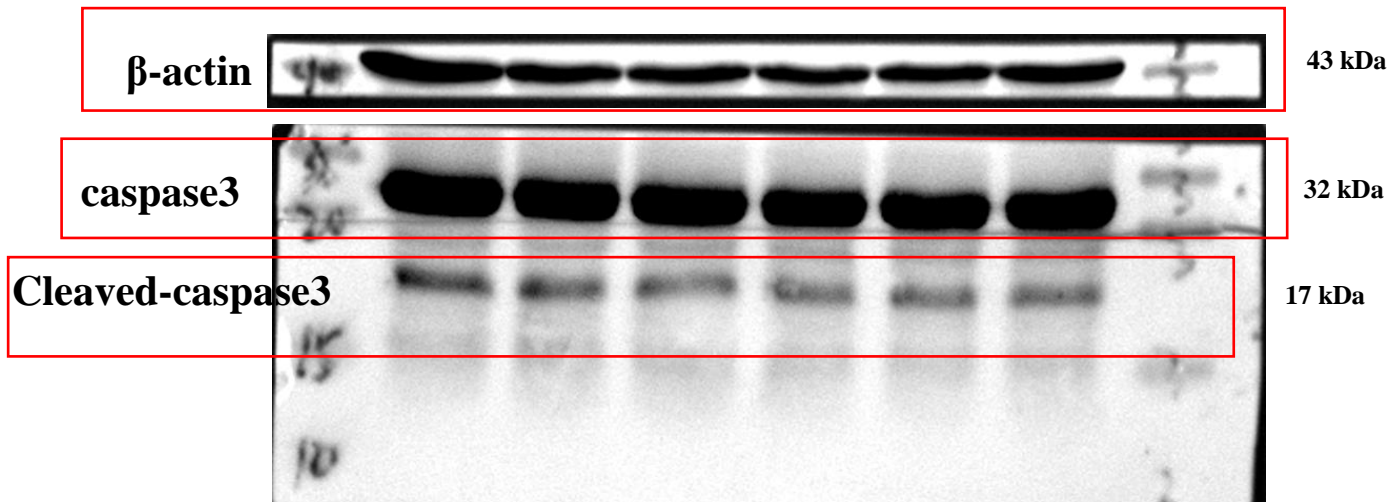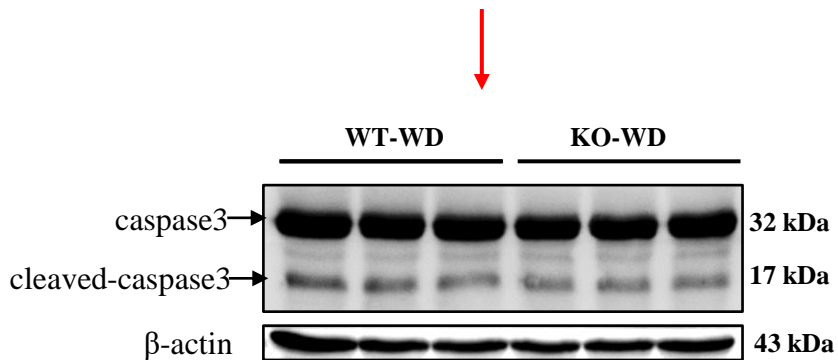

Supplement: supp [file Figure 4-figure supplement 3B-uncropped gels or blots.pdf › Figure 4-figure supplement 3-source data-1/Uncropped gels or blots/Figure 4-figure supplement 3B-uncropped gels or blots.pdf]

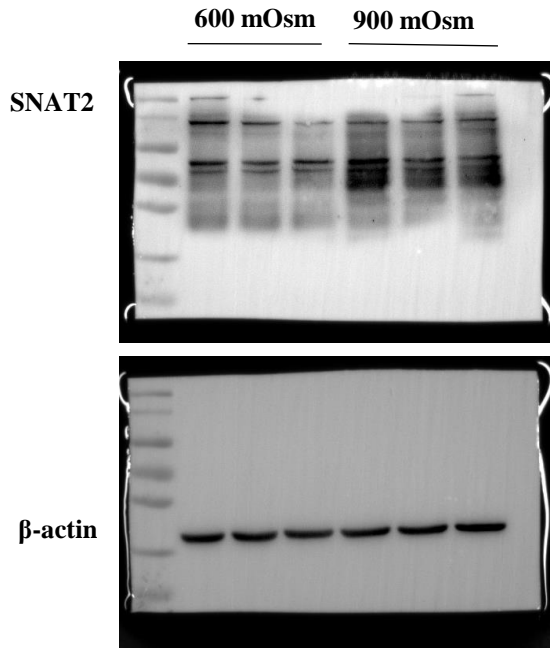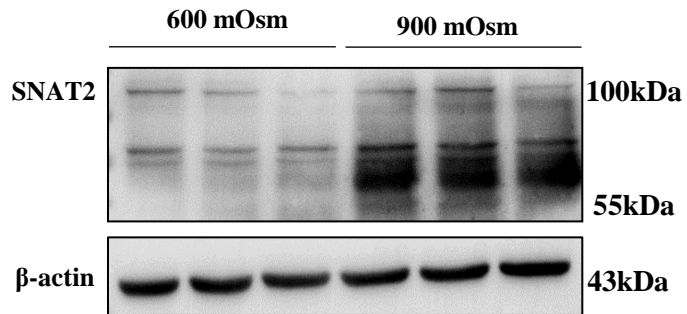

Supplement: supp [file Figure 5-figure supplement 1D-uncropped gels or blots.pdf › Figure 5-figure supplement 1-source data-1/Uncropped gels or blots/Figure 5-figure supplement 1D-uncropped gels or blots.pdf]

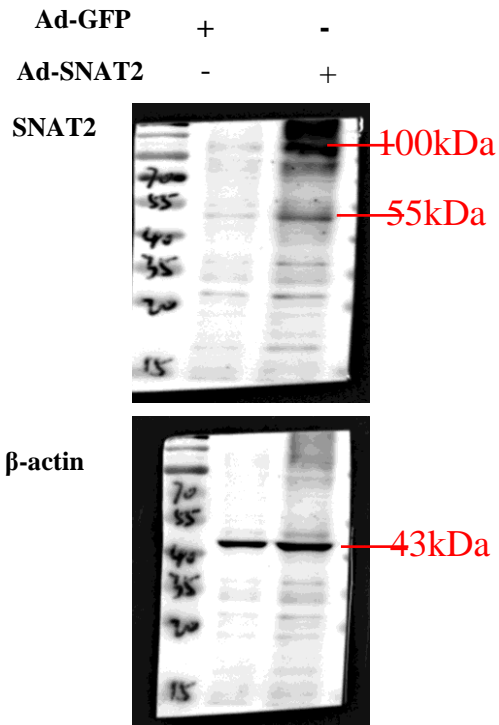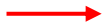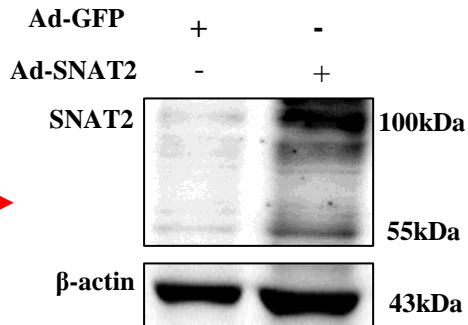

Supplement: supp [file Figure 7B-uncropped gels or blots.pdf › Figure 7-source data-1/Uncropped gels or blots/Figure 7B-uncropped gels or blots.pdf]

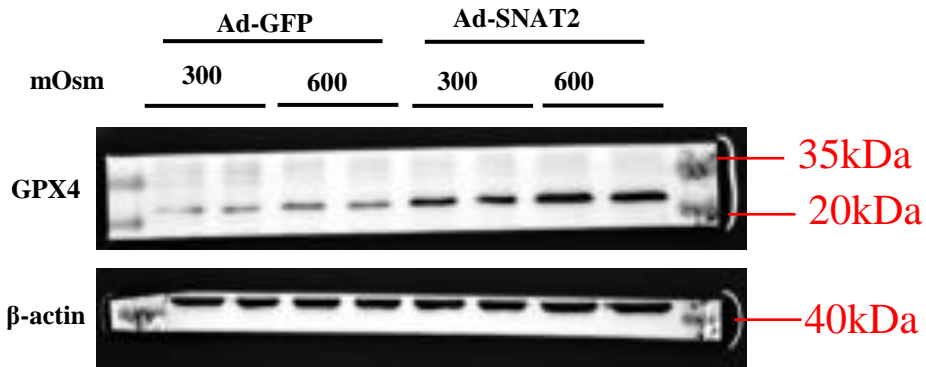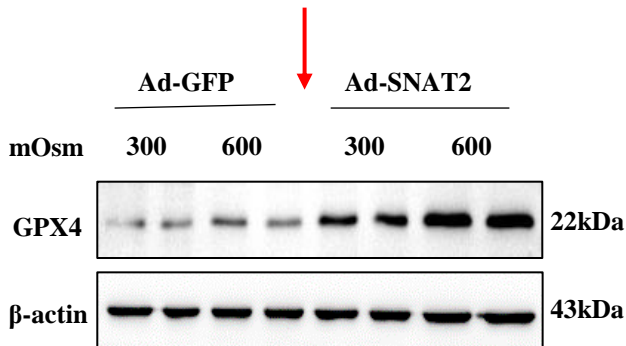

Supplement: supp [file Figure 7E-uncropped gels or blots.pdf › Figure 7-source data-1/Uncropped gels or blots/Figure 7E-uncropped gels or blots.pdf]

siNC siRNA-SNAT2

SNAT2

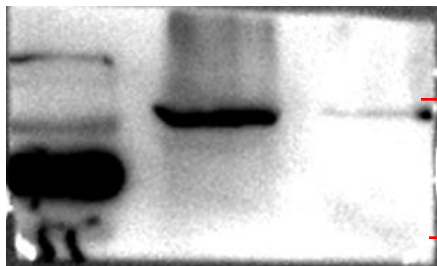

100 kDa

55 kDa

$\beta$ -actin

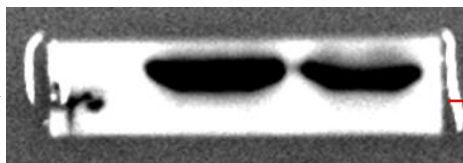

40 kDa

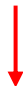

siNC siRNA-SNAT2

SNAT2

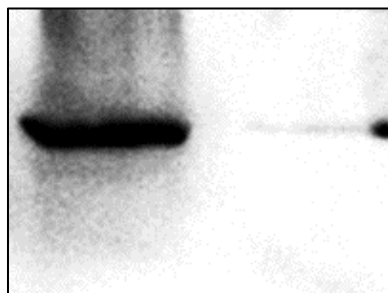

100 kDa

56 kDa

$\beta$ -actin

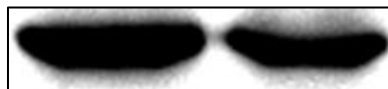

43 kDa

Supplement: supp [file Figure 8-figure supplement 1B-uncropped gels or blots.pdf › Figure 8-figure supplement 1-source data-1/Uncropped gels or blots/Figure 8-figure supplement 1B-uncropped gels or blots.pdf]

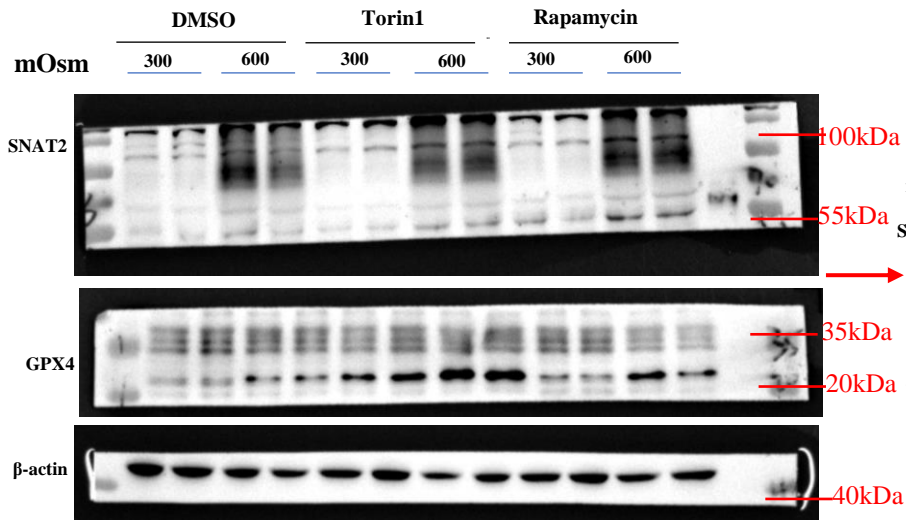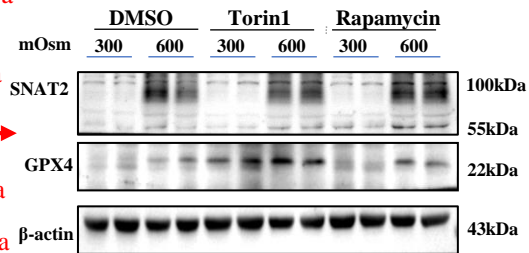

Supplement: supp [file Figure 9-figure supplement 1B-uncropped gels or blots.pdf › Figure 9-figure supplement 1-source data-1/Uncropped gels or blots/Figure 9-figure supplement 1B-uncropped gels or blots.pdf]

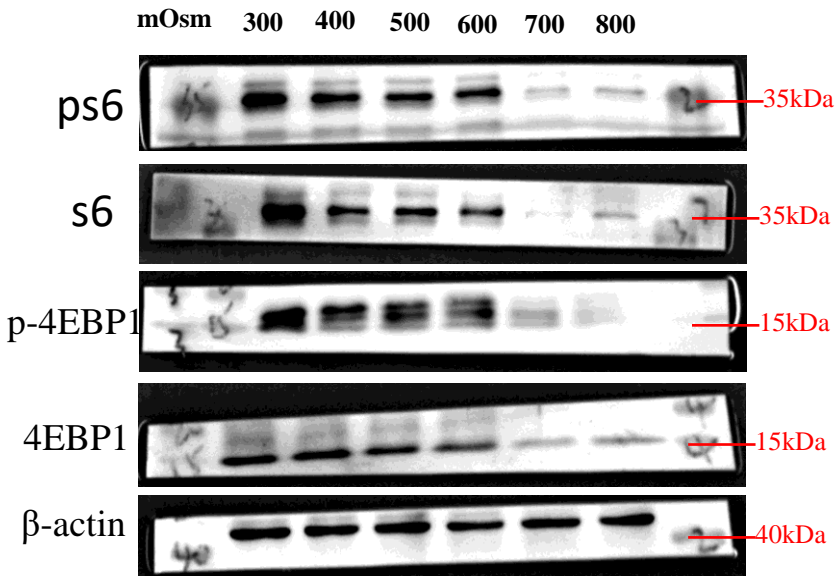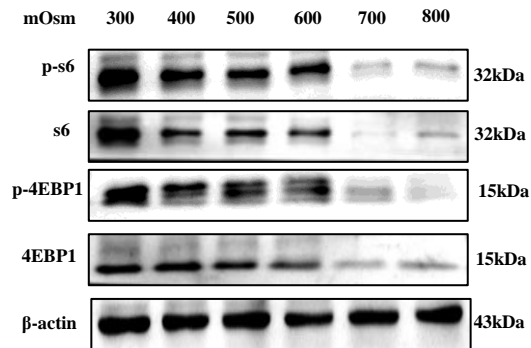

Supplement: supp [file Figure 9A-uncropped gels or blots.pdf › Figure 9-source data-1/Uncropped gels or blots/Figure 9A-uncropped gels or blots.pdf]

| mOsm     | 300 |   | 600 |   |
|----------|-----|---|-----|---|
| Ad-GFP   | +   | - | +   | - |
| Ad-SNAT2 | -   | + | -   | + |

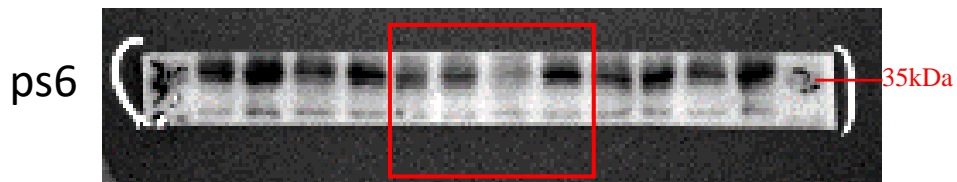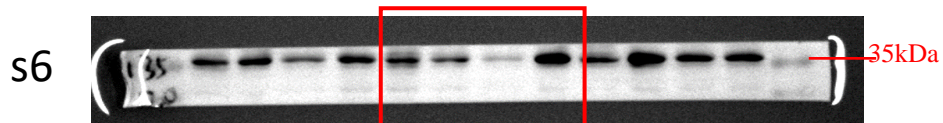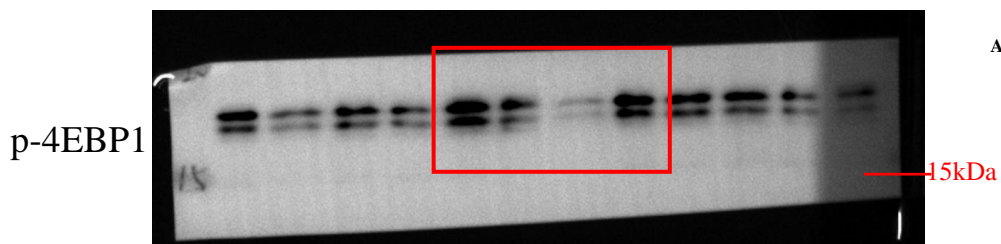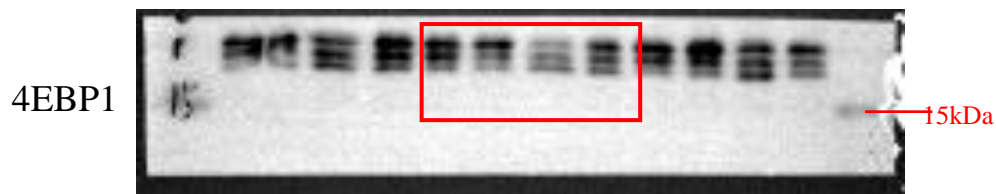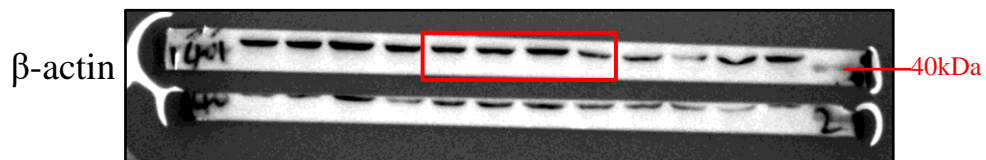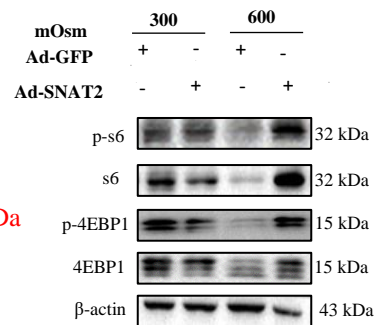

Supplement: supp [file Figure 9F-uncropped gels or blots.pdf › Figure 9-source data-1/Uncropped gels or blots/Figure 9F-uncropped gels or blots.pdf]

A

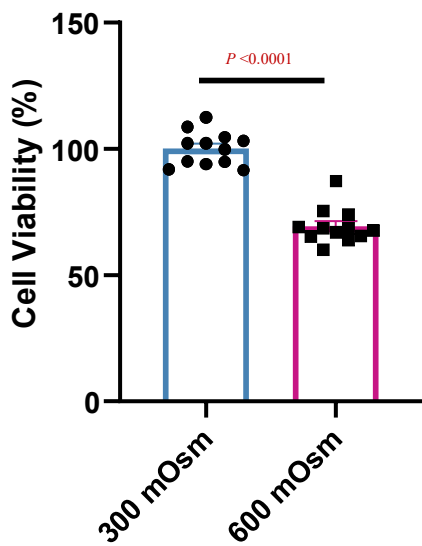

B

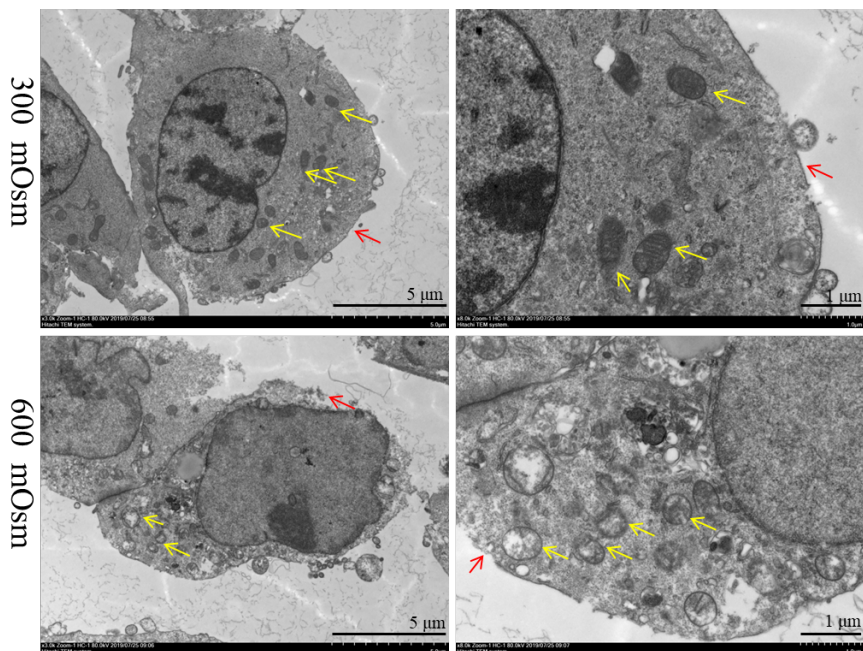

Supplement: supp [file elife_poa_e80647_Figure_1_figure_supplement_1.pdf › elife_poa_e80647_Figure_1_figure_supplement_1.pdf]

A

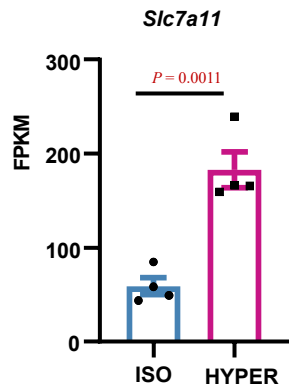

B

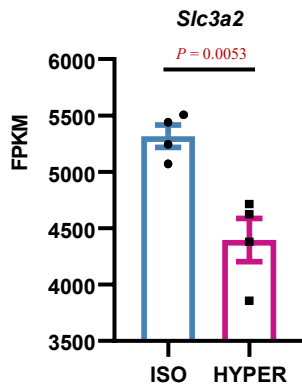

C

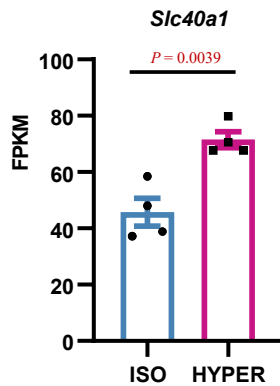

D

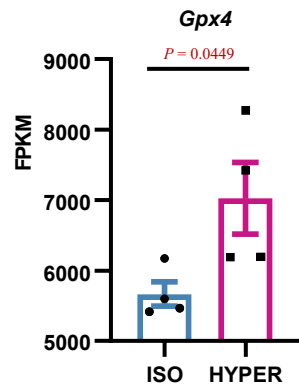

E

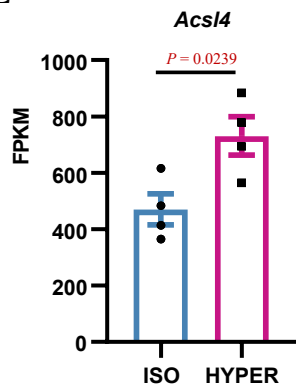

F

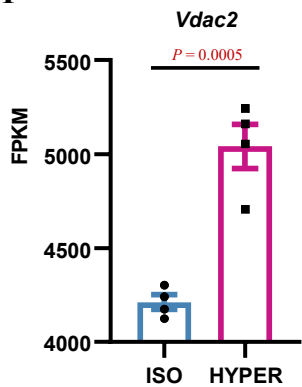

G

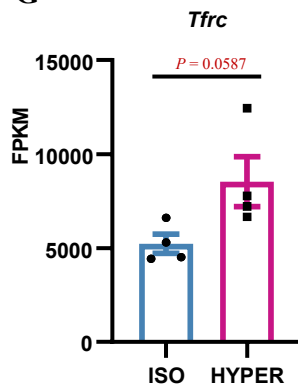

H

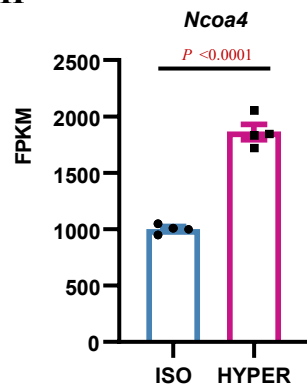

Supplement: supp [file elife_poa_e80647_Figure_1_figure_supplement_2.pdf › elife_poa_e80647_Figure_1_figure_supplement_2.pdf]

A

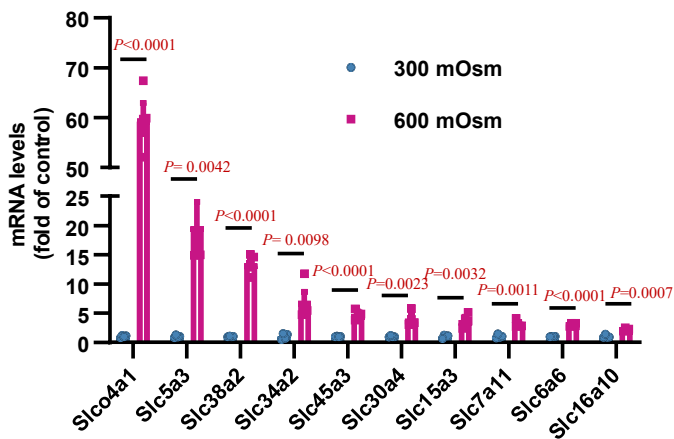

B

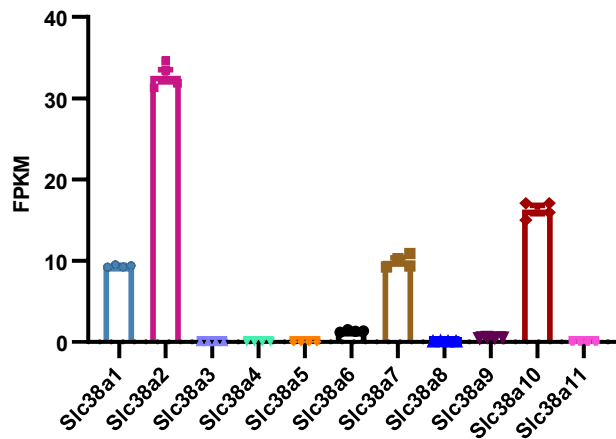

C

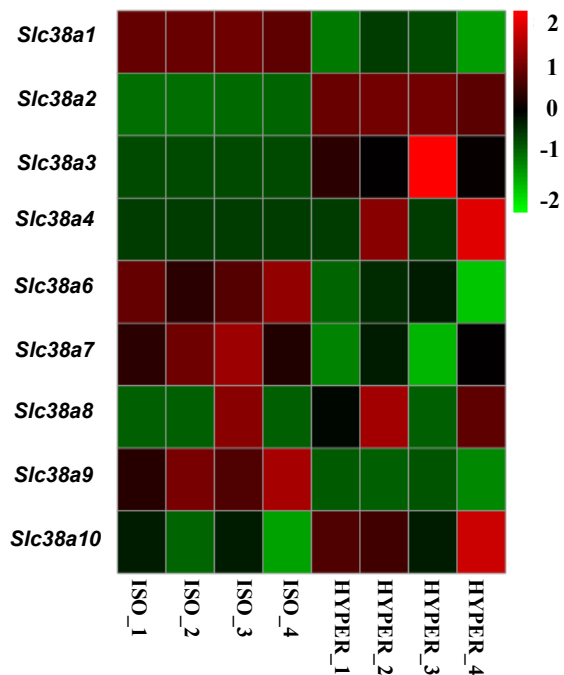

Supplement: supp [file elife_poa_e80647_Figure_2_figure_supplement_1.pdf › elife_poa_e80647_Figure_2_figure_supplement_1.pdf]

Average expression (rescaled)

0 0.25 0.5 0.75 1

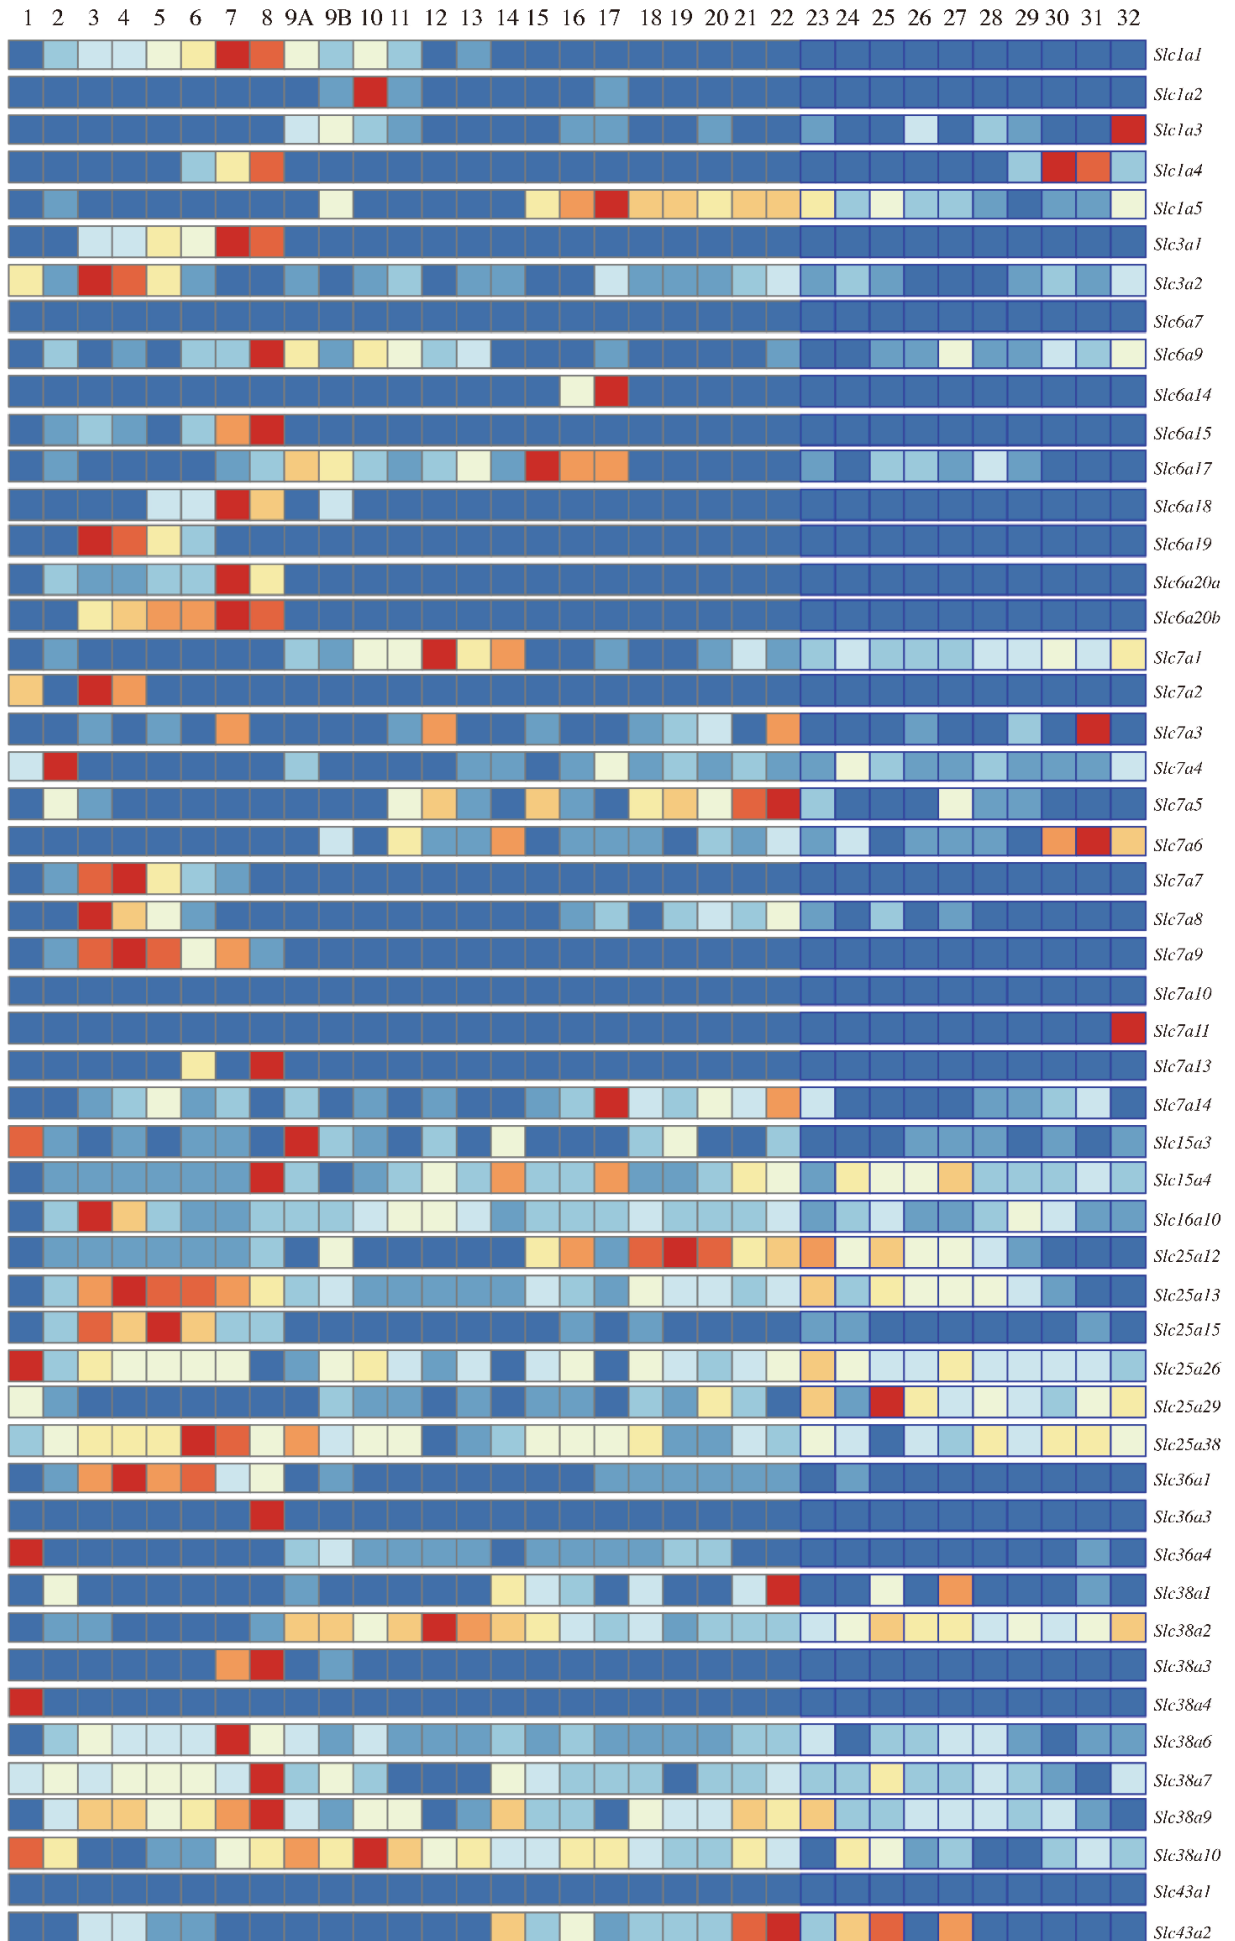

Supplement: supp [file elife_poa_e80647_Figure_2_figure_supplement_2.pdf › elife_poa_e80647_Figure_2_figure_supplement_2.pdf]

A

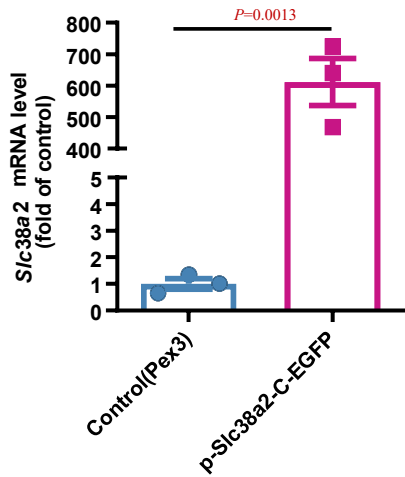

B

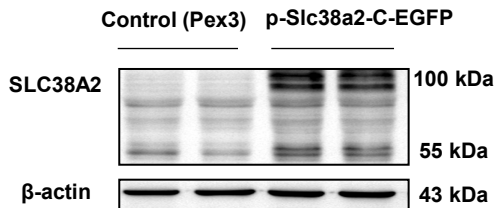

C

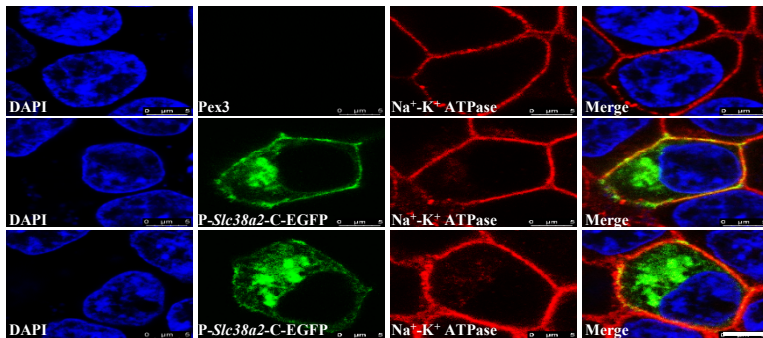

Supplement: supp [file elife_poa_e80647_Figure_2_figure_supplement_4.pdf › elife_poa_e80647_Figure_2_figure_supplement_4.pdf]

A

*Slc38a2*<sup>+/+</sup>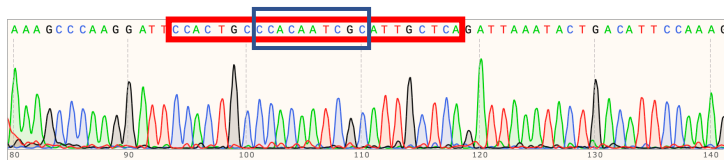*Slc38a2*<sup>+/-</sup>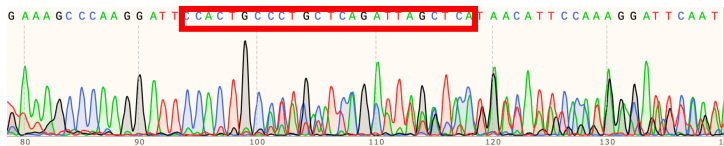*Slc38a2*<sup>-/-</sup>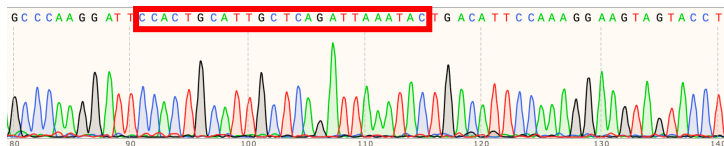

B

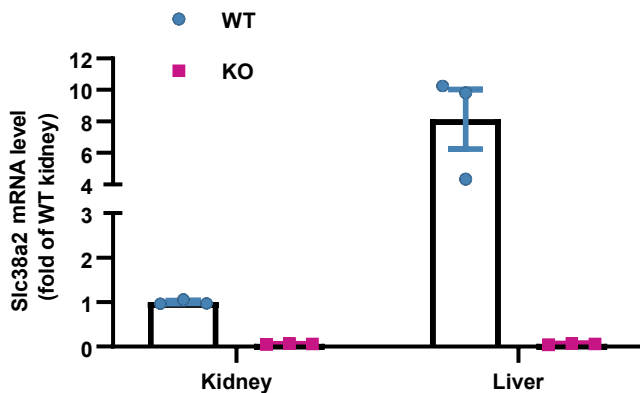

Supplement: supp [file elife_poa_e80647_Figure_4_figure_supplement_1.pdf › elife_poa_e80647_Figure_4_figure_supplement_1.pdf]

**A**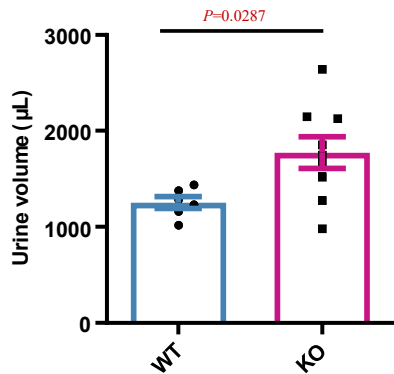**B**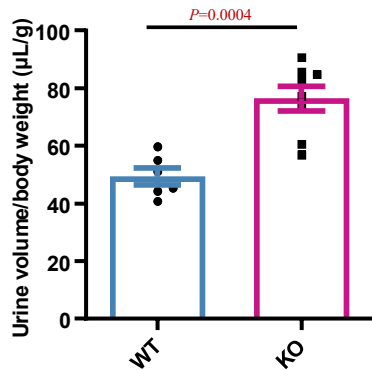**C**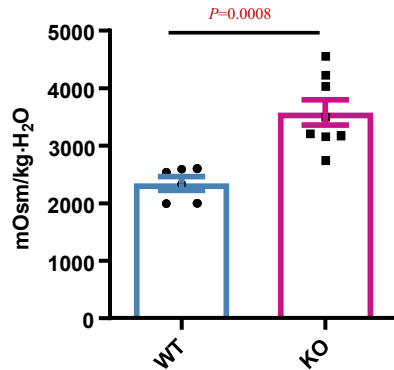**D**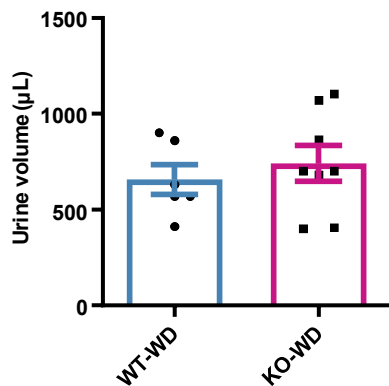**E**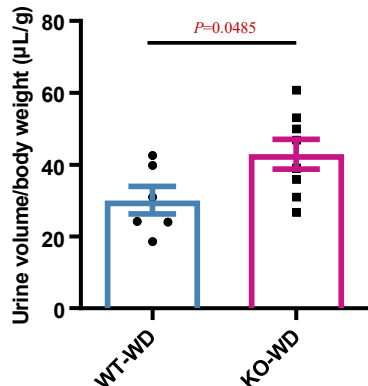**F**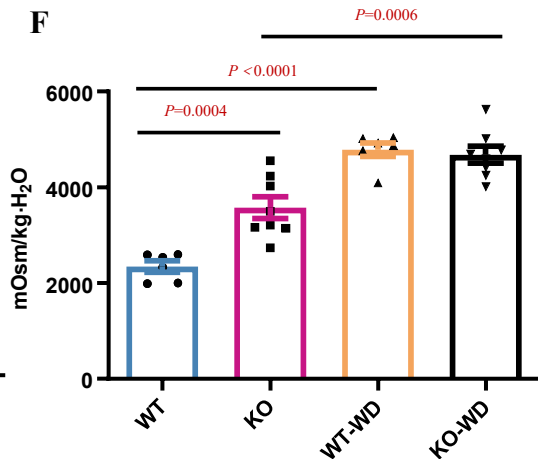

Supplement: supp [file elife_poa_e80647_Figure_4_figure_supplement_2.pdf › elife_poa_e80647_Figure_4_figure_supplement_2.pdf]

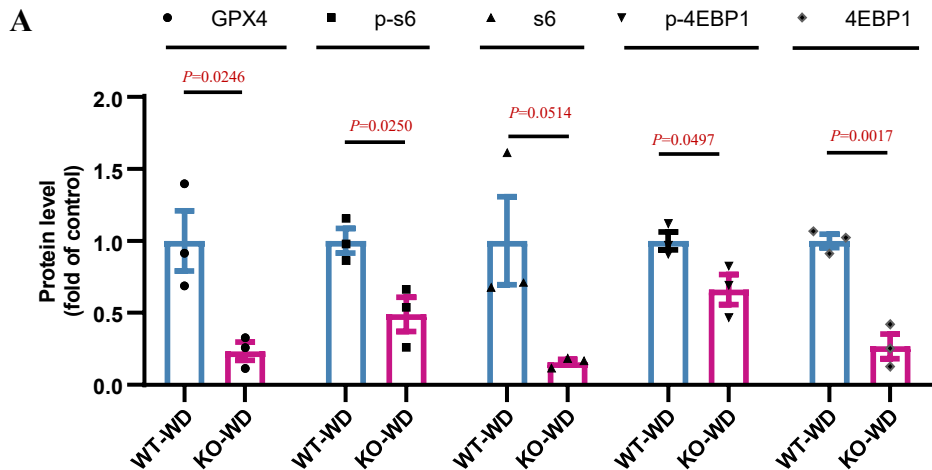

**B**

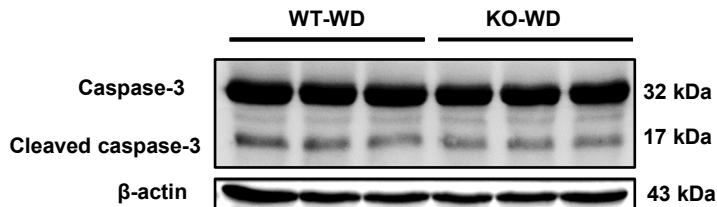

**C**

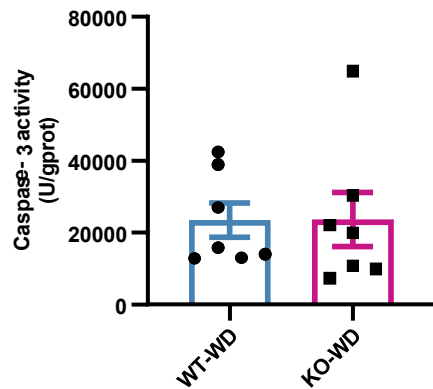

Supplement: supp [file elife_poa_e80647_Figure_4_figure_supplement_3.pdf › elife_poa_e80647_Figure_4_figure_supplement_3.pdf]

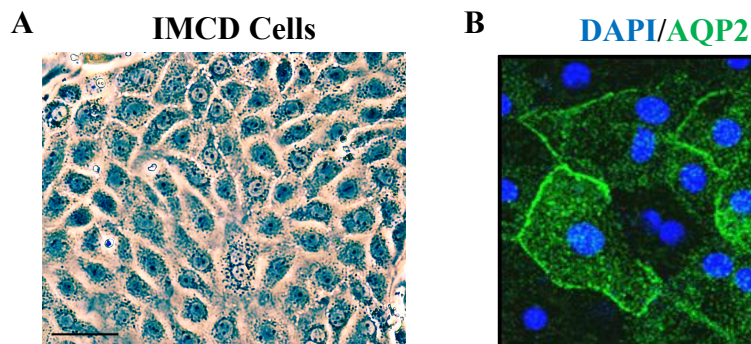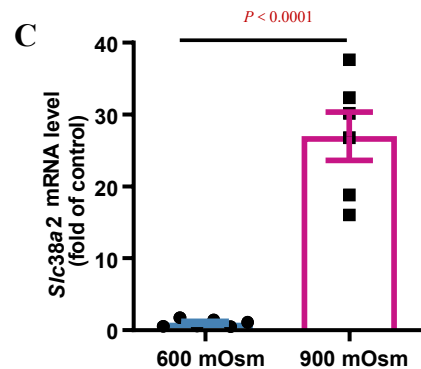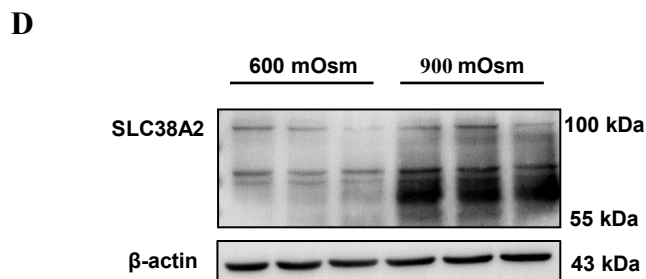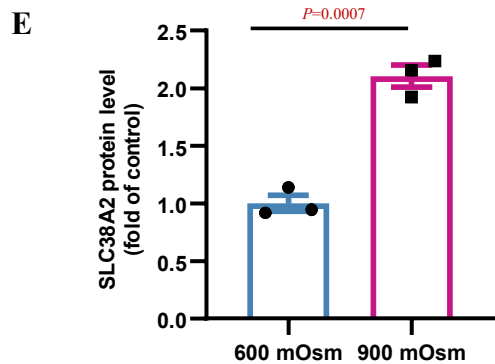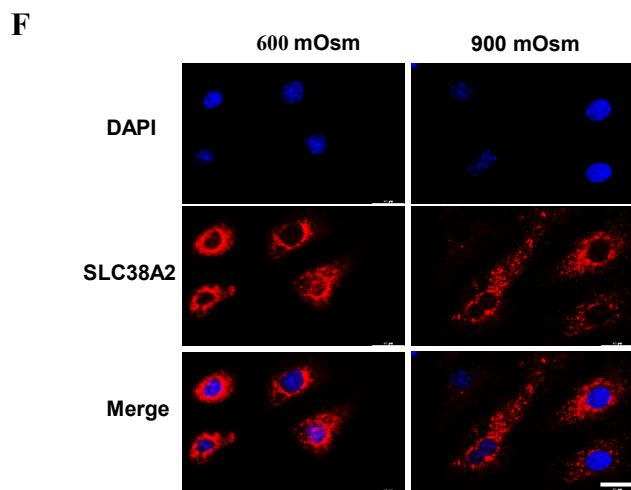

Supplement: supp [file elife_poa_e80647_Figure_5_figure_supplement_1.pdf › elife_poa_e80647_Figure_5_figure_supplement_1.pdf]

**A**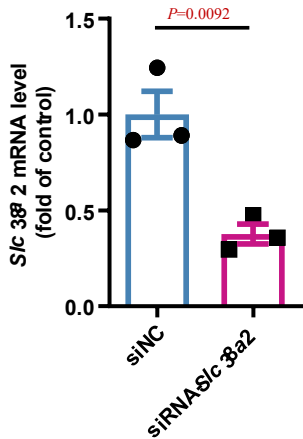**B**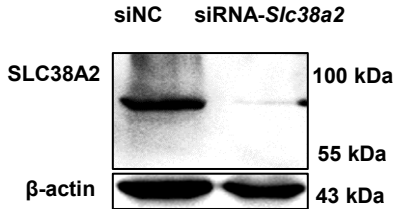

Supplement: supp [file elife_poa_e80647_Figure_8_figure_supplement_1.pdf › elife_poa_e80647_Figure_8_figure_supplement_1.pdf]

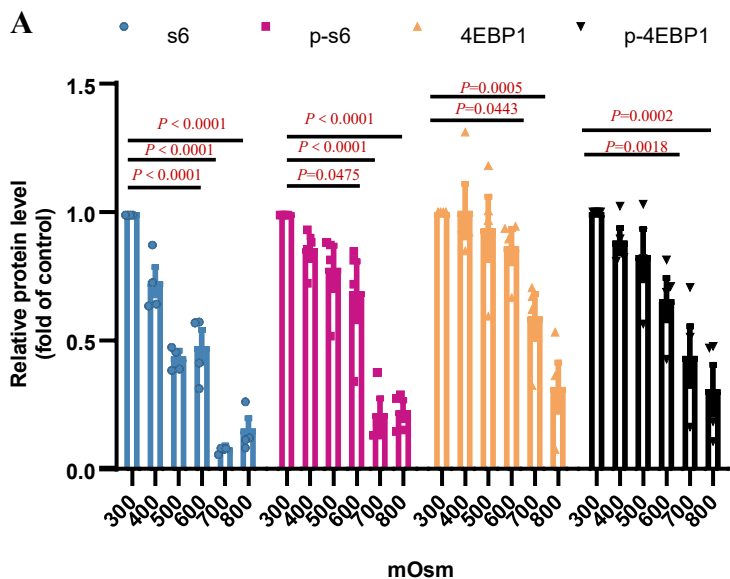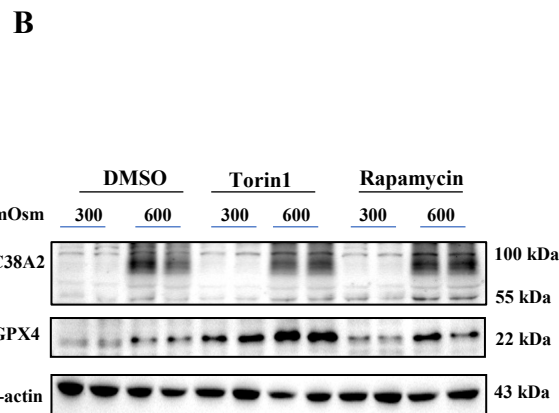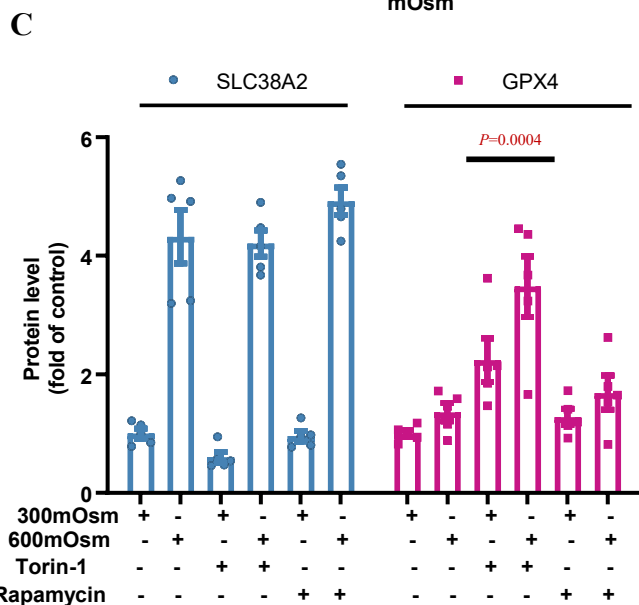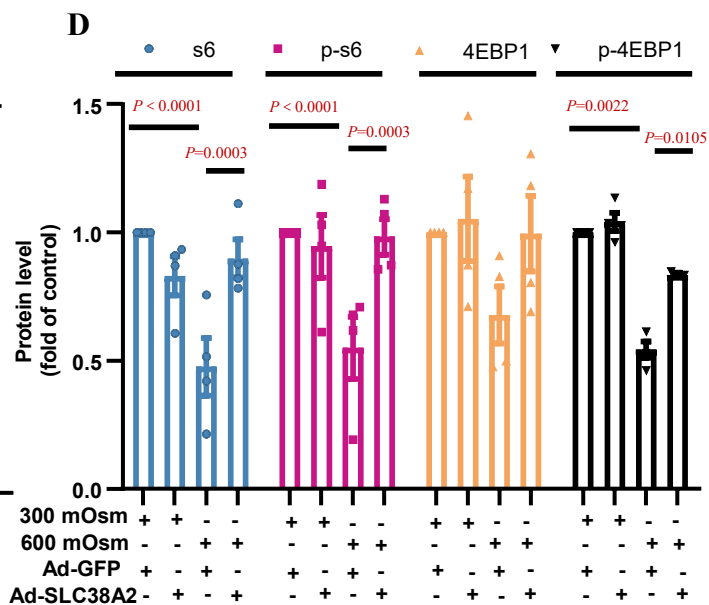

Supplement: supp [file elife_poa_e80647_Figure_9_figure_supplement_1.pdf › elife_poa_e80647_Figure_9_figure_supplement_1.pdf]
